# Supplementary material for: Prognostic Value and Potential Role of Alternative mRNA Splicing Events in Cervical Cancer
Source: Front Genet. 2020 Jul 10;11:726. doi: 10.3389/fgene.2020.00726 (PMC7394696; doi:10.3389/fgene.2020.00726)
Supplement: TABLE S1 — Survival related AS events were filtered by univariate COX regression. [file Table_1.XLSX]

## Sheet: CC univariate COX regression
Survival related AS events were filtered by univariate COX regression
Gene-As id-Splice type	z	HR	HR.95L	HR.95H	pvalue
CLIP1-24953-AD	-5.34147	2.00573e-05	3.78897e-07	0.00106176	9.21955e-08
FOXRED2-62052-AP	4.85634	6.86581	3.1551	14.9407	1.19573e-06
OPA3-50486-AP	-4.80966	0.0165874	0.00312125	0.0881513	1.51187e-06
PRR13-22038-AA	-4.71777	0.000945256	5.23675e-05	0.0170623	2.38448e-06
FCF1-28425-AD	4.69095	11.9328	4.23507	33.6222	2.71944e-06
NDUFA3-51782-ES	4.662	8.78722	3.52407	21.9108	3.13158e-06
HNRNPA1-22146-ES	4.64465	1039.26	55.4263	19486.3	3.40658e-06
C1QTNF1-43985-AP	4.55408	4.31185	2.2989	8.08737	5.26162e-06
ATF3-9733-AP	-4.5322	0.00473765	0.000468115	0.0479482	5.83723e-06
PRKAG2-82384-AP	4.48011	2.55036	1.69325	3.84134	7.46043e-06
HNRNPA1-301521-ES	4.44717	34.1843	7.20835	162.113	8.70102e-06
CD59-14907-AT	-4.42113	8.61833e-06	4.90011e-08	0.0015158	9.81882e-06
HNRNPA2B1-79038-AA	-4.39717	0.000359691	1.04905e-05	0.0123329	1.09669e-05
ISLR2-31672-RI	-4.39237	0.414265	0.279577	0.613842	1.12123e-05
FAM175A-69797-AP	-4.37493	0.00010144	1.64814e-06	0.00624343	1.21472e-05
PRKAG2-82385-AP	-4.35575	0.406319	0.270937	0.609349	1.32612e-05
POP4-48845-ES	-4.33946	5.07767e-07	7.2905e-10	0.000353649	1.42837e-05
TBC1D22A-62728-ES	-4.32235	4.34633e-05	4.57335e-07	0.00413059	1.54379e-05
SERPING1-15866-AP	-4.30764	0.363362	0.229243	0.575949	1.65006e-05
SLC39A6-45210-ES	-4.28801	0.00391763	0.000311058	0.0493406	1.80281e-05
MAN2A2-32515-ES	-4.25476	0.0686807	0.0199996	0.235857	2.09269e-05
SERPING1-15865-AP	4.25421	2.67565	1.70023	4.21066	2.09785e-05
MAN2A2-32517-AA	-4.24258	0.149874	0.0623636	0.36018	2.20963e-05
NHLRC3-25701-ES	-4.23411	0.102681	0.0358021	0.294489	2.2946e-05
DMKN-49154-ES	-4.22043	0.000171471	3.05739e-06	0.00961681	2.43842e-05
FBXL8-36932-RI	-4.20203	0.232285	0.117575	0.458913	2.64531e-05
SHF-30409-AP	4.1941	2.37733	1.58613	3.56322	2.73959e-05
GRK6-74764-AT	-4.19387	0.0263651	0.00482074	0.144193	2.74231e-05
RPS15A-34266-AD	4.16344	59.3286	8.6794	405.544	3.13486e-05
HNRNPAB-74850-AD	-4.11848	0.00145571	6.50126e-05	0.0325952	3.81381e-05
MFSD12-46693-AP	-4.10674	0.316444	0.18273	0.548003	4.01281e-05
ALPK1-70366-AT	-4.09373	0.0164804	0.00230834	0.117661	4.2449e-05
WNT7B-62673-AP	-4.07514	0.117479	0.0419424	0.329055	4.59861e-05
MFSD12-46692-AP	4.0429	3.09192	1.78883	5.34425	5.27949e-05
PAMR1-15418-ES	-4.02754	0.0336914	0.0064707	0.175424	5.63636e-05
TNNI1-9376-AT	-3.97604	0.0247579	0.00399857	0.153294	7.00738e-05
C1QTNF1-43983-AP	-3.95381	0.324894	0.186082	0.567255	7.6915e-05
ZNF438-11132-RI	-3.95136	0.0973974	0.0306792	0.309208	7.77097e-05
ACSS1-58860-AT	-3.9487	0.0492329	0.0110445	0.219464	7.85773e-05
ANKRD11-38078-AT	3.93213	22.1202	4.72586	103.537	8.41963e-05
GAPVD1-87563-AT	-3.92781	3.0003e-07	1.66836e-10	0.00053956	8.57239e-05
ACSS1-58859-AT	3.91453	22.2746	4.70951	105.352	9.05796e-05
TP73-333-ES	-3.91403	0.00519742	0.000373217	0.0723792	9.07668e-05
SLC39A1-7764-AP	3.88929	35.81	5.90039	217.334	0.00010054
RBM7-18824-AA	-3.87927	0.0891622	0.0262888	0.302407	0.000104769
YDJC-61233-AD	-3.8784	0.0948313	0.028837	0.311855	0.000105146
SSBP2-72672-ES	-3.86619	0.00846873	0.000753922	0.0951284	0.000110548
HNRNPA1-22147-ES	3.85277	13.9798	3.65398	53.4851	0.000116788
NADK-225-AP	3.85072	3.01939	1.72047	5.29897	0.000117772
FBXO18-10672-ES	3.85026	293.133	16.2634	5283.45	0.000117994
HNRNPA2B1-79035-AA	3.84502	5.57238	2.32142	13.3761	0.000120541
FIG4-77213-ES	-3.84053	0.000121715	1.22336e-06	0.0121098	0.000122767
ISLR2-31673-RI	-3.82839	0.424983	0.274229	0.65861	0.000128985
KLHL26-48496-AT	3.82404	19.5691	4.26179	89.8569	0.000131284
ECE1-963-AP	3.81697	6.92127	2.56308	18.69	0.000135098
P2RY6-17682-AP	-3.80569	0.29224	0.155093	0.550667	0.000141412
NME2-42514-ES	-3.79996	0.0835448	0.02322	0.300592	0.000144719
KDM2B-24877-AT	3.79372	143.048	11.0125	1858.14	0.000148408
STARD10-17645-AD	-3.78728	1.15702e-06	9.79594e-10	0.00136658	0.000152306
SHF-30407-AP	-3.78309	0.434019	0.281648	0.668822	0.000154895
ZNF219-26528-AP	3.77196	2.82354	1.64648	4.8421	0.00016197
CLCA4-3682-AT	-3.76114	0.0707395	0.0177914	0.281264	0.000169144
TFDP1-26386-AP	3.74911	14.9477	3.63521	61.4639	0.000177464
NUP62-51129-AD	-3.73781	0.0148645	0.00163566	0.135084	0.000185633
GEMIN7-50397-ES	3.73582	7.83065	2.65996	23.0527	0.000187108
ZNF782-86986-ES	-3.73266	0.0978604	0.0288795	0.331608	0.00018947
NCALD-84756-AA	-3.72615	0.021185	0.00278943	0.160895	0.00019443
HGSNAT-83760-AP	-3.72563	0.000437162	7.47079e-06	0.0255811	0.000194827
PLLP-36539-ES	-3.72452	3.16852e-05	1.35913e-07	0.00738674	0.000195687
PXN-24742-AP	3.71849	3.8882	1.90064	7.95421	0.00020042
TTC3-60545-AP	-3.71066	0.369293	0.218201	0.625008	0.000206722
SLC25A3-23859-RI	-3.70363	0.10923	0.0338399	0.352575	0.000212539
SRSF11-3373-AP	-3.69961	0.235856	0.109721	0.506994	0.000215928
GEMIN4-38259-AP	-3.69608	0.355408	0.205346	0.615132	0.000218952
NPDC1-88260-AP	-3.69056	0.29079	0.150904	0.56035	0.000223764
MZF1-52489-AA	-3.68742	0.000274397	3.50979e-06	0.0214525	0.00022654
APOC1-50371-ES	-3.67145	0.000182384	1.8406e-06	0.0180724	0.000241174
S100A2-7722-AA	-3.66585	2.67632e-05	9.61287e-08	0.00745117	0.000246515
ANKRD13C-3399-ES	-3.66363	0.000142914	1.25349e-06	0.0162939	0.000248662
NMRAL1-33734-ES	3.66255	27.8804	4.69751	165.474	0.000249713
RABL6-88219-ES	-3.6555	0.00724871	0.000516416	0.101747	0.000256682
FOXJ3-2064-AP	3.64805	2.29012	1.4673	3.57436	0.000264234
CSRP2BP-58755-AP	-3.64345	0.00663411	0.000446714	0.0985227	0.000269006
XRN1-67114-ES	-3.64231	0.0289906	0.00431302	0.194864	0.000270202
BAZ1A-27172-AP	-3.63839	0.0720653	0.0174741	0.297206	0.000274347
GEMIN4-38260-AP	3.63801	2.74321	1.59275	4.72464	0.000274748
MCC-73005-AP	3.63726	2.23091	1.44777	3.43767	0.00027555
EPS8L2-13727-AP	-3.63161	0.168338	0.0643513	0.440361	0.000281659
TIMM8B-18730-ES	3.63098	10.7057	2.97742	38.494	0.000282347
DHRS4L2-26803-ES	-3.62805	0.0128051	0.00121602	0.134841	0.000285574
BAZ1A-27173-AP	3.62412	14.1537	3.3765	59.3302	0.000289952
EBPL-25914-ES	3.62351	3.09846	1.68068	5.71227	0.000290631
SYK-86818-AP	3.62046	2.49878	1.522	4.10243	0.000294079
SRSF11-3370-AP	3.61755	3.6752	1.81558	7.43953	0.000297404
CNOT2-23374-ES	-3.61094	0.00202531	6.99027e-05	0.0586797	0.000305091
NME4-32873-AP	-3.60122	0.0744802	0.0181196	0.306148	0.000316721
CARKD-26250-AP	3.5936	16.5346	3.57995	76.3681	0.000326142
RPS6KA5-28832-AT	-3.59131	0.013912	0.0013494	0.14343	0.000329023
MCC-73004-AP	-3.5884	0.446102	0.287049	0.693284	0.000332714
TATDN1-85097-ES	-3.58212	0.121852	0.0385165	0.385498	0.000340821
TTC3-60546-AP	3.56903	2.60068	1.53865	4.39578	0.000358299
SLC16A3-44300-AP	3.56901	3.58707	1.77868	7.23404	0.000358336
PIF1-31133-AA	-3.5637	0.012621	0.00113955	0.139783	0.000365661
NUTF2-37146-AP	-3.56077	0.0290916	0.00415123	0.203873	0.000369765
SLC16A3-44301-AP	-3.55878	0.169942	0.0640318	0.45103	0.000372583
HMHA1-46375-AP	-3.54362	0.294499	0.149774	0.579071	0.000394677
CDKN2A-86000-AP	3.54103	4.93866	2.04031	11.9542	0.000398565
EPS8L2-13729-AP	3.53971	5.42873	2.1276	13.8518	0.000400571
ERBB2IP-72262-ES	-3.53073	0.392617	0.233655	0.659726	0.00041441
DYX1C1-30732-AT	3.52015	16.3954	3.45448	77.8143	0.00043131
FAM156B-89172-ES	-3.51992	9.533e-05	5.50028e-07	0.0165225	0.00043167
POLR2L-13788-AT	3.51847	12.2971	3.03898	49.76	0.000434049
CASP1-18527-AD	-3.51763	0.00512125	0.000271069	0.0967545	0.000435411
CGREF1-52931-AP	-3.51391	0.431596	0.270105	0.689638	0.000441567
DPM1-59794-ES	-3.5114	0.000103145	6.1414e-07	0.0173232	0.000445752
CARKD-26251-AP	-3.50825	0.0670855	0.0148286	0.3035	0.000451057
APC2-46498-ES	-3.50748	0.000638139	1.04596e-05	0.0389326	0.000452371
GLT8D2-24090-AT	-3.50391	4.69649e-05	1.78123e-07	0.0123831	0.000458474
CSDE1-4333-ES	3.49807	30.2256	4.47634	204.092	0.000468632
SCRN1-79097-AP	3.49303	4.13614	1.86474	9.17426	0.000477572
CSAD-21941-AP	3.48835	10.2623	2.77375	37.9688	0.000486019
FYN-77269-AP	3.48788	1.82965	1.30297	2.56923	0.000486867
GEMIN7-50396-ES	3.47989	7.58174	2.42248	23.7289	0.000501624
ZNF398-82171-AP	3.47696	2.38678	1.46164	3.8975	0.00050714
KANK1-85710-AP	3.47189	2.39781	1.46353	3.92853	0.000516811
PFDN5-22007-ES	3.47024	4.23349	1.87389	9.56427	0.000519991
SMIM7-48188-RI	-3.46994	0.00392944	0.000171994	0.0897738	0.000520566
MRPL52-26647-AD	3.46708	18.7389	3.5748	98.2278	0.000526153
KLHL26-48497-AT	-3.46597	0.0626576	0.0130821	0.300103	0.000528326
ZCCHC4-68960-AT	-3.46406	0.0533091	0.0101491	0.280012	0.00053209
KRT13-40902-AT	-3.46264	0.0141204	0.00126648	0.157432	0.000534906
CGREF1-52930-AP	3.46231	2.39164	1.45989	3.91805	0.000535561
PCGF5-12507-AP	-3.45774	1.18505e-05	1.91147e-08	0.00734696	0.000544721
RAB30-18042-AT	-3.45334	0.0103339	0.000771343	0.138446	0.000553693
SLC20A2-83729-AP	3.45128	5.96828	2.16395	16.4608	0.000557941
FAM49B-85157-ES	-3.45054	0.000538427	7.48779e-06	0.0387169	0.000559462
DDHD2-83376-AP	-3.44942	0.334744	0.179744	0.623406	0.00056179
ANKRD6-77003-AT	-3.44854	0.0993402	0.026739	0.369066	0.00056362
NPDC1-88261-AP	3.44832	3.01083	1.6092	5.63331	0.000564091
AK3-85777-ES	-3.448	1.32092e-05	2.22543e-08	0.00784044	0.000564752
POLR2L-13787-AT	-3.43773	0.0903083	0.0229274	0.355714	0.000586603
NUTF2-37145-AP	3.43084	26.4078	4.06938	171.371	0.000601715
PGAM5-25293-AT	-3.42896	8.55607e-05	4.04761e-07	0.0180863	0.000605896
RPL17-45484-AA	3.42644	6.94324	2.29181	21.0352	0.000611555
CENPT-99708-AA	-3.42383	0.000221826	1.79596e-06	0.0273986	0.000617449
CGGBP1-65669-ES	3.42166	4.55375	1.91094	10.8515	0.000622407
TIMM17B-89020-ES	3.42146	25.8008	4.00856	166.066	0.00062285
RPLP0-24740-AA	3.42145	6.13671	2.17055	17.3501	0.000622893
ZNF32-11341-AP	-3.42114	0.171202	0.0622858	0.470577	0.000623603
OSBPL1A-44877-AP	3.41776	2.10846	1.37462	3.23407	0.000631397
RPL17-94829-AA	3.4174	4.98305	1.98365	12.5177	0.000632215
PTCHD4-76445-AT	3.41706	2.74744	1.53875	4.90556	0.000633004
REPIN1-82232-AP	3.41149	2.92213	1.57814	5.41069	0.000646084
DDHD2-83377-AP	3.41084	3.02764	1.60195	5.72217	0.000647634
RASGEF1B-69694-AT	-3.40863	0.00314591	0.000114538	0.0864057	0.000652893
HNRNPLL-53264-RI	3.40697	2.65629	1.51425	4.65966	0.000656892
IGF1-24051-AT	3.40596	2.39961	1.45007	3.97093	0.00065931
SNRNP35-25074-AP	-3.40042	0.0696448	0.0149949	0.32347	0.000672824
C1orf86-247-AT	-3.40002	0.102158	0.027426	0.380527	0.000673816
NPRL3-32833-RI	-3.39649	0.380256	0.217649	0.664348	0.000682566
OSBPL1A-44876-AP	-3.3963	0.472252	0.306297	0.728121	0.000683023
IGF1-24050-AT	-3.38992	0.419207	0.253587	0.692995	0.000699123
ATP6V0E2-82210-AD	-3.3882	0.00673221	0.000373092	0.121479	0.000703542
NDUFAF2-72172-AD	3.38632	12.051	2.85324	50.8988	0.000708378
STK3-84654-AT	-3.38239	2.6909e-05	6.04921e-08	0.01197	0.000718584
GAS6-26396-AP	3.375	1.97759	1.33095	2.9384	0.000738151
VTA1-77963-ES	-3.37113	0.000884971	1.48554e-05	0.0527199	0.000748606
CENPJ-25487-ES	-3.36885	0.0664155	0.0137113	0.321708	0.000754821
RRBP1-58741-ES	-3.36802	9.29831e-05	4.19069e-07	0.0206311	0.000757091
TMCC1-66747-AP	-3.36327	0.128619	0.0389267	0.424973	0.00077024
NPIPA5-34150-ES	3.36151	3.45193	1.67625	7.10861	0.000775171
TANK-55744-ES	-3.35748	0.293705	0.143648	0.600515	0.000786562
LY96-84219-ES	3.35661	49.6394	5.07708	485.331	0.000789036
SH2D3C-87662-AP	-3.35566	0.337219	0.178721	0.636279	0.000791753
RALGDS-88012-AP	3.35246	2.79124	1.53168	5.08659	0.000800961
PODNL1-47949-AP	-3.35188	0.520946	0.355789	0.762771	0.00080264
URGCP-79361-ES	-3.35098	0.000217707	1.57008e-06	0.0301872	0.000805253
POMGNT1-2783-AP	-3.34334	0.404742	0.238174	0.687799	0.000827753
ZCCHC4-68961-AT	3.34061	16.5289	3.1878	85.7036	0.000835936
NAGPA-33873-ES	-3.33885	0.0732054	0.0157765	0.339685	0.00084126
SH2D3C-87664-AP	3.33706	2.56477	1.47503	4.4596	0.000846699
CERS4-47207-AA	-3.33702	0.0358147	0.00506762	0.253115	0.00084682
MGAT1-75021-AP	3.33666	2.94884	1.56234	5.56577	0.00084791
DLAT-18711-ES	-3.33627	0.000205952	1.40672e-06	0.0301526	0.00084911
FER-72933-ES	-3.33623	0.000393562	3.93236e-06	0.0393888	0.000849243
PON2-80536-AD	-3.33442	0.046544	0.00767076	0.282416	0.000854762
C1orf86-246-AT	3.33423	9.93732	2.57658	38.3261	0.00085536
SLC16A5-43350-AP	-3.33401	0.27266	0.127011	0.585332	0.000856031
RNF157-43574-AT	3.33401	64.9402	5.58457	755.157	0.000856051
ZNF32-11340-AP	3.33301	5.71606	2.05064	15.9333	0.00085911
NAA60-33539-ES	-3.3329	0.0901216	0.0218877	0.371072	0.000859453
IL1RN-95654-ME	3.33227	2.1092	1.35981	3.27157	0.000861414
PAIP1-71962-AD	3.33058	3.69347	1.71204	7.96813	0.000866665
REEP5-72996-ES	-3.33044	0.124102	0.0363468	0.423731	0.000867097
HNRNPA1-120409-ES	3.32439	279.112	10.0883	7722.14	0.000886115
UBE2E1-63714-AP	3.32333	2.69034	1.50081	4.82268	0.000889482
MAX-27937-RI	-3.32323	0.410874	0.243155	0.694279	0.000889808
BUB3-13390-AA	3.31967	5.11888	1.95196	13.4239	0.000901243
DAPL1-55686-AT	3.31295	1.67238	1.2337	2.26705	0.000923184
FAM172A-72785-ES	-3.3084	0.000458916	4.83144e-06	0.0435904	0.000938307
WTAP-78310-AP	-3.30365	0.299702	0.146631	0.61257	0.000954356
WTAP-78311-AP	3.29566	3.23636	1.60961	6.5072	0.000981909
SLC6A9-2538-AT	3.29449	25.4316	3.70925	174.366	0.000986007
DYRK1B-49843-AT	-3.29286	0.000604908	7.34685e-06	0.0498055	0.000991721
CCDC64-24712-AP	-3.29117	0.148823	0.0478607	0.462768	0.000997706
HNRNPA3-56126-AD	3.29112	5.60271	2.00772	15.6348	0.000997909
MRPL52-26642-RI	-3.28819	0.313938	0.157373	0.626261	0.00100832
POMGNT1-2781-AP	3.2876	2.3582	1.41404	3.93281	0.00101045
TFIP11-61514-ES	-3.28566	0.0832284	0.0188882	0.366735	0.00101745
C21orf58-60935-ES	-3.28442	0.00141159	2.81066e-05	0.070894	0.00102193
RAP1GAP2-38418-RI	-3.28068	1.79361e-06	6.61838e-10	0.00486076	0.00103558
FANCL-53656-ES	-3.2802	6.99027e-05	2.29892e-07	0.0212551	0.00103733
ENTPD6-58863-AA	-3.27761	0.0844722	0.019271	0.370275	0.00104691
SYNJ2-78244-AP	3.27702	2.34529	1.40859	3.90489	0.0010491
CKMT1B-30282-AA	3.27541	13.7522	2.86539	66.0025	0.0010551
AP2M1-67841-ES	3.27361	5.58881	1.99474	15.6585	0.00106183
DNASE1L1-90573-AP	-3.25997	0.218491	0.0875564	0.54523	0.00111422
SGSH-44036-ES	-3.25766	0.0021662	5.40414e-05	0.0868299	0.00112335
RABEP1-38673-ES	-3.25679	0.00261018	7.27786e-05	0.0936134	0.00112678
AUTS2-79911-ES	3.25531	9.73949	2.47375	38.3457	0.0011327
FHL1-90192-ES	-3.25525	0.00466531	0.000184217	0.118149	0.00113292
SCRN1-79096-AP	-3.25282	0.0854479	0.0194091	0.376181	0.00114266
UQCRQ-73319-AD	3.25252	2.81409	1.50858	5.24938	0.00114385
AMDHD2-93844-AD	-3.25181	0.675983	0.533867	0.855931	0.00114674
NMRAL1-33738-RI	3.24918	3.64343	1.67031	7.94738	0.00115737
KLC2-16993-ES	-3.24533	0.199135	0.0751412	0.527734	0.00117313
CDK11A-216-ES	3.24328	594.773	12.5248	28244.4	0.00118161
SLC6A9-2536-AT	-3.23868	0.0421296	0.0061976	0.286385	0.00120084
ZFHX3-37557-AP	-3.23537	0.29662	0.142057	0.619352	0.00121486
ST8SIA1-20727-AT	-3.23479	0.375035	0.207015	0.679427	0.00121733
MUC4-68197-ES	-3.23424	0.146522	0.0457546	0.469211	0.00121966
C17orf70-44128-AP	-3.23395	0.315886	0.157115	0.635104	0.00122091
ZFHX3-37558-AP	3.23144	3.38413	1.61555	7.08879	0.00123169
SYNJ2-78242-AP	-3.23039	0.418911	0.247088	0.710216	0.00123623
FBXO7-61934-ES	-3.2271	6.58261e-05	1.89987e-07	0.0228072	0.0012505
RABL5-81059-AT	-3.22322	0.03792	0.00518457	0.277348	0.00126757
AMDHD2-93845-ES	-3.22228	0.688421	0.548565	0.863932	0.00127173
CADM1-18858-ES	-3.22057	0.111351	0.0292776	0.4235	0.00127936
SP140-57870-AT	-3.2175	0.234384	0.0968531	0.567207	0.00129315
ST8SIA1-20726-AT	3.21448	2.66456	1.46592	4.84332	0.0013068
HNRNPA2B1-79037-ES	3.21322	2.96472	1.52788	5.75278	0.00131254
HAGH-33147-ES	3.21252	3.06757	1.54811	6.07839	0.00131575
MT1X-36494-AT	-3.21076	6.25364e-06	4.16394e-09	0.00939207	0.00132384
PACRGL-68892-ES	-3.20907	0.345606	0.18062	0.661297	0.00133165
TMPRSS13-18947-AT	3.20895	2.86012	1.50534	5.43419	0.00133222
ICAM2-43038-AP	3.20637	2.23315	1.36658	3.64924	0.00134422
ILDR1-66413-AP	-3.1992	0.0389566	0.00533473	0.284479	0.00137809
GIT2-24376-ES	-3.19898	0.00169448	3.39868e-05	0.0844813	0.00137914
REPIN1-82248-ES	-3.19698	0.378411	0.208559	0.686594	0.00138872
RNF157-43575-AT	-3.19137	0.0279738	0.00311049	0.251578	0.00141602
CKMT1B-30281-AT	3.18889	22.4403	3.31631	151.846	0.00142821
SFSWAP-25214-ES	3.18703	57.9315	4.77258	703.196	0.00143744
DTNBP1-75420-ES	-3.18412	0.076917	0.0158607	0.373012	0.00145193
DAPL1-55687-AT	-3.18151	0.609783	0.449607	0.827023	0.00146508
ZNF398-82169-AP	-3.18084	0.42413	0.250019	0.719493	0.0014685
ADIRF-12443-ES	-3.17969	0.0853958	0.0187401	0.389136	0.00147435
PACRGL-68904-ES	-3.17786	0.266183	0.117668	0.602148	0.00148365
NADK-228-AP	-3.1775	0.337124	0.172392	0.659266	0.00148549
MXRA7-43613-ES	3.17739	5.41311	1.90995	15.3416	0.00148608
P4HA1-12123-ES	-3.17612	0.0676984	0.012851	0.356632	0.00149258
CLPB-17603-ES	-3.17558	0.00144345	2.54792e-05	0.0817742	0.00149538
SLC29A2-17026-ES	-3.1677	0.149593	0.0461746	0.484643	0.00153648
TCEB2-33298-AP	-3.16721	0.000148412	6.34256e-07	0.0347277	0.00153907
ATL2-53252-ES	-3.16336	0.0390666	0.00523978	0.291271	0.00155958
PKN1-47977-AP	3.16315	2.33669	1.38104	3.95362	0.00156073
YPEL3-36066-AP	3.16301	1.9068	1.27824	2.84445	0.00156147
SEPT5-61077-ES	-3.16269	0.00116661	1.77525e-05	0.0766647	0.0015632
PTCHD4-76446-AT	-3.16182	0.367653	0.197724	0.683622	0.00156787
MLPH-58112-AP	3.16074	12.6155	2.61962	60.7532	0.00157367
ARHGAP11A-29819-AD	-3.16057	0.000494639	4.40877e-06	0.0554957	0.00157461
CUL4B-90003-AP	3.15972	4.15015	1.71665	10.0334	0.00157919
RPL17-45481-AP	3.1595	4.70291	1.79999	12.2875	0.00158039
NME4-32875-AP	3.15866	3.17189	1.5497	6.49213	0.00158494
PGS1-43881-ES	-3.15865	0.289263	0.133974	0.624547	0.00158504
RPL23-94524-AA	-3.1541	0.373438	0.202485	0.68872	0.00160996
ZNF692-10549-AP	3.15357	1.93973	1.28502	2.92803	0.00161287
CNTNAP3-86469-RI	-3.15285	0.475733	0.299776	0.75497	0.00161684
PNKD-57460-AP	-3.15202	0.262173	0.11404	0.602722	0.00162147
C4orf36-69840-AT	-3.15179	0.179097	0.0614632	0.521867	0.0016227
HGF-80250-AT	-3.15043	0.447711	0.271566	0.73811	0.00163028
MMP2-36439-AP	-3.14857	0.000152938	6.44764e-07	0.036277	0.00164073
DTNB-52868-ES	-3.14803	0.0367376	0.00469623	0.287391	0.00164374
POMZP3-80186-ES	-3.14299	0.0127373	0.000838316	0.19353	0.00167232
CDK11A-215-ES	3.14154	2.50305	1.41212	4.43679	0.00168059
NFE2L2-56132-RI	-3.14074	0.236643	0.0962715	0.581685	0.00168524
UBE2E1-63715-AP	-3.13987	0.37269	0.201268	0.690112	0.0016902
ARHGEF16-307-AP	3.13571	1.98715	1.29367	3.05237	0.00171437
DLD-81377-AT	3.13301	15.1411	2.7661	82.8792	0.00173023
PKD2L2-73491-AT	3.13163	6.9206	2.0622	23.225	0.00173837
MLPH-58111-AP	-3.13155	0.100982	0.0240449	0.424096	0.00173887
PKN1-47976-AP	-3.12981	0.394721	0.220535	0.706485	0.00174918
RPL17-45479-AP	-3.12792	0.217363	0.0835341	0.565598	0.00176051
DIP2A-60939-AT	3.12735	43.8371	4.10082	468.611	0.00176391
NKIRAS2-40981-RI	-3.12435	0.0023862	5.40376e-05	0.10537	0.00178196
PHLPP2-37469-AP	3.12254	2.39027	1.38326	4.13039	0.00179298
GLYCTK-65200-RI	-3.12051	0.323987	0.159622	0.657598	0.00180537
S100A2-91124-ES	3.11682	3.83321	1.64664	8.92331	0.00182813
TMUB1-82343-AP	-3.11563	0.242867	0.0997054	0.591586	0.00183555
SLC25A3-23862-RI	-3.11501	0.0729165	0.0140384	0.378734	0.00183936
C17orf70-44127-AP	3.11474	2.92832	1.48935	5.75758	0.0018411
ATF2-56080-ES	-3.11254	0.0034315	9.62899e-05	0.122289	0.00185484
SSBP2-72676-ES	-3.11015	0.00795724	0.000378317	0.167366	0.00186995
EIF4G1-67918-ES	3.10963	3.56972	1.60072	7.96072	0.00187322
MFI2-68274-AT	-3.10913	0.341022	0.173083	0.671912	0.00187642
OCIAD1-69244-ES	-3.10778	0.377814	0.204496	0.698029	0.00188496
ESRP1-84568-ES	3.10681	4.13253	1.68838	10.1149	0.00189119
FAU-16777-RI	-3.10377	0.00467699	0.000157979	0.138463	0.00191073
PNKD-57461-AP	3.10291	3.62668	1.60728	8.18323	0.0019163
TATDN1-85094-ES	-3.10277	2.26463e-05	2.63535e-08	0.0194607	0.00191716
UBE2J2-48-ES	3.10254	30.6926	3.52884	266.954	0.00191868
EIF5A2-67621-AA	-3.10055	0.00844508	0.000412989	0.172691	0.00193162
TNFRSF11B-84998-ES	-3.09795	0.564385	0.393013	0.810485	0.00194863
RABL5-81057-AT	3.09712	19.6879	2.98666	129.781	0.00195408
SH3KBP1-88643-AP	3.09628	1.6962	1.21399	2.36994	0.00195965
ICAM2-43039-AP	-3.09586	0.460497	0.28185	0.752377	0.00196245
MARCH9-22744-AP	-3.09491	0.253734	0.106458	0.604751	0.0019687
PIP4K2C-22655-ES	-3.09436	0.000220685	1.06641e-06	0.045669	0.00197237
MFI2-68275-AT	3.09394	2.90287	1.47786	5.70192	0.00197514
ADCK3-10038-ES	-3.09153	0.000429676	3.15226e-06	0.058568	0.00199131
DNASE1L1-90575-AP	3.09103	2.80807	1.45908	5.40425	0.00199466
ARHGAP12-11153-ES	-3.09071	0.397821	0.221733	0.713747	0.00199679
IFI44-102200-ES	3.08928	3.28392	1.54445	6.98253	0.00200639
SLC16A5-43347-AP	3.08608	3.16526	1.52265	6.57988	0.00202817
LEMD2-75767-AP	-3.08518	0.453257	0.274174	0.749313	0.00203426
TMUB1-82345-AP	3.08489	3.81501	1.62947	8.9319	0.00203627
AP2B1-40327-AD	3.08293	3.14139	1.51732	6.50378	0.00204971
NONO-89417-ES	-3.08162	0.000632846	5.84613e-06	0.0685058	0.00205877
PRSS22-33312-ES	-3.0806	7.13308e-05	1.64064e-07	0.0310128	0.00206587
WDR37-10612-AP	3.07684	3.61363	1.59416	8.19139	0.00209208
CNOT8-74259-ES	-3.07403	4.55236e-07	4.11917e-11	0.0050311	0.00211186
ZFAND6-32173-ME	-3.07308	4.37281e-05	7.25281e-08	0.0263642	0.00211859
DYRK2-22919-ES	3.07306	3.24862	1.5323	6.88738	0.00211872
GABPB1-30577-ES	-3.0716	0.000236311	1.14666e-06	0.0487004	0.00212912
TC2N-28886-AD	3.06889	3.10052	1.50514	6.38695	0.00214858
FBXO5-78211-AP	3.06864	2.70537	1.43272	5.10848	0.00215034
STK25-58383-AP	-3.06815	0.279197	0.123581	0.630765	0.00215386
FOXRED2-62054-AP	-3.06673	0.399733	0.222463	0.718258	0.00216413
SECTM1-44322-AA	-3.06575	0.0002998	1.67663e-06	0.0536075	0.00217123
DCN-23664-ES	3.06432	2.36717	1.36417	4.10761	0.00218168
RUSC1-8077-AP	3.06257	2.74287	1.43802	5.23172	0.00219444
IRF8-37917-AT	-3.06218	0.00126335	1.76334e-05	0.0905125	0.00219732
MCFD2-53478-ES	-3.06138	0.325349	0.158542	0.667658	0.00220319
PKD2L2-73490-AT	-3.05882	0.117506	0.0297984	0.463369	0.00222211
FAM131A-67927-AP	3.05879	3.27484	1.53135	7.00336	0.00222235
ETS1-19411-ES	-3.05825	0.0244631	0.00226853	0.263802	0.00222634
PIGT-59553-AD	-3.05624	0.395736	0.218385	0.717116	0.00224135
PBX1-8787-AT	-3.05469	0.00425897	0.000128294	0.141385	0.00225295
STX8-39219-ES	-3.05232	0.00726133	0.000307274	0.171596	0.00227081
B4GALT2-2515-AP	3.05161	1.84592	1.24518	2.7365	0.00227619
DYNC2H1-18489-ES	-3.05074	0.174674	0.0569366	0.535875	0.00228282
HNRNPDL-69705-ES	3.04894	4.1649	1.66457	10.421	0.00229651
ZNF580-52121-AP	-3.04701	0.49714	0.317133	0.779321	0.00231132
TMPRSS12-21715-RI	-3.04393	0.0987334	0.0222334	0.438452	0.00233512
IKBKB-83586-AT	-3.04263	0.0003164	1.76118e-06	0.056842	0.00234518
CYP4F12-48111-RI	3.04103	1.77502	1.22628	2.56931	0.00235774
ZKSCAN1-80869-ES	-3.03963	0.00114299	1.44896e-05	0.0901626	0.00236868
PABPC4-1893-ES	3.03833	154.362	5.9808	3984.01	0.00237891
TMEM25-19005-AP	3.037	2.60003	1.40336	4.81715	0.00238942
METAP2-23795-AA	-3.0341	0.0395757	0.00491358	0.318756	0.00241252
PPP1R21-53521-AP	-3.03233	0.0661926	0.0114454	0.382813	0.00242677
PDCD2-78499-AT	3.0322	5.40488	1.81604	16.086	0.00242781
ACAD9-66680-ES	-3.03192	0.0783468	0.0151032	0.406419	0.00243006
MAP7D1-1756-AP	-3.03154	0.246429	0.0996336	0.609505	0.00243306
BPTF-43116-AD	-3.0311	0.169341	0.0537114	0.533898	0.00243665
UQCC1-59094-ES	-3.02918	0.00312404	7.47707e-05	0.130528	0.00245214
RUSC1-8078-AP	-3.02844	0.372506	0.196597	0.705813	0.00245817
DBNDD1-38197-AP	3.02766	2.92928	1.46084	5.87383	0.00246458
HNRNPUL1-50035-AA	-3.02737	0.000355251	2.07636e-06	0.0607809	0.00246689
MSANTD2-19240-AP	-3.02682	0.313509	0.14793	0.664422	0.00247138
ESR2-27867-AT	3.02473	10.0803	2.25549	45.0507	0.00248857
ELN-80049-AD	-3.02263	0.126613	0.0331513	0.48357	0.00250589
YPEL3-36075-RI	-3.02164	0.50836	0.327779	0.788426	0.00251406
PFDN5-22011-ES	3.01939	2.87621	1.44873	5.71023	0.00253282
C11orf48-16384-AP	-3.0191	0.0315561	0.0033474	0.297481	0.00253523
SLC25A32-84813-ES	-3.01607	0.000282861	1.39849e-06	0.0572121	0.00256078
USP54-12168-ES	-3.01405	0.0258906	0.00240573	0.278636	0.00257785
MARCH9-22743-AP	3.01313	3.70985	1.58127	8.70377	0.00258564
PIGK-3520-ES	-3.01204	4.02355e-05	5.55246e-08	0.0291564	0.00259499
DNASE1L3-65424-RI	3.00896	1.64463	1.1894	2.2741	0.00262146
TANGO2-61128-AD	3.00885	2.88405	1.44663	5.74975	0.00262236
GSTZ1-28590-ES	-3.00826	0.0106597	0.000553055	0.205458	0.00262746
LDLRAD3-15419-ES	-3.00816	0.327053	0.157895	0.677435	0.00262832
TMEM205-47661-ES	-3.00802	0.0580831	0.0090935	0.370995	0.00262953
AP3S2-32446-AT	-3.00547	4.88666e-05	7.54528e-08	0.0316482	0.00265174
TMC6-43754-AP	3.00167	2.62239	1.39735	4.92141	0.00268502
PFN2-67262-AA	-3.00068	0.000252506	1.12806e-06	0.0565216	0.0026938
ZSCAN20-1678-AT	-2.99762	0.209074	0.0751423	0.581722	0.00272098
TUSC3-82769-AT	-2.99708	0.000647205	5.31616e-06	0.0787925	0.00272578
MIB2-198-AD	2.99642	4.40646	1.67028	11.6249	0.00273171
BCS1L-57554-AD	2.99594	3.65192	1.56501	8.5217	0.00273599
CABYR-44862-ES	-2.9949	0.11744	0.0289115	0.477046	0.00274536
NT5DC2-65224-AP	-2.99414	0.387597	0.208417	0.72082	0.0027522
ZNF18-39297-AA	-2.99269	0.296546	0.133769	0.657398	0.00276533
OSGEPL1-56531-ES	-2.99235	0.000287106	1.37433e-06	0.0599784	0.00276839
TPT1-25799-AD	2.99183	4.13564	1.63171	10.482	0.00277312
RAET1G-78132-AA	-2.99149	0.363594	0.187388	0.705491	0.00277617
RIPK1-75164-ES	-2.99127	0.00256495	5.14561e-05	0.127856	0.00277816
USP48-1001-AA	-2.98991	0.0419262	0.0052419	0.335338	0.00279061
TMEM170A-37612-RI	-2.98932	0.00198003	3.34363e-05	0.117254	0.00279603
MDFI-76116-AP	-2.98825	0.360879	0.184943	0.704181	0.00280584
C16orf87-36315-ES	-2.98818	0.11655	0.0284598	0.4773	0.00280641
DLD-81376-AT	-2.98762	0.0832784	0.0163069	0.425299	0.0028116
TSC22D4-80951-AA	-2.98536	0.0209335	0.0016536	0.265004	0.00283249
NEDD9-75341-AA	-2.98524	0.000732748	6.40672e-06	0.0838056	0.00283355
OFD1-88523-ES	2.98512	7.40661	1.98905	27.5799	0.00283469
RNF13-67240-ES	-2.9849	0.321029	0.15224	0.676956	0.00283672
IL1RN-55038-ES	-2.98287	0.0796575	0.0151096	0.419953	0.00285559
UBE2G1-38532-ES	-2.9795	0.00296456	6.44132e-05	0.136442	0.0028872
NGFRAP1-89732-AA	-2.97945	0.174855	0.0555254	0.550636	0.00288764
TARS2-7477-ES	-2.97881	0.0159539	0.00104811	0.242843	0.00289375
NT5DC2-65225-AP	2.97664	2.55991	1.37857	4.75358	0.00291423
SLC39A1-7763-AP	-2.97607	0.0131959	0.000763147	0.228175	0.00291966
ZNF580-52122-AP	2.97501	1.95959	1.25801	3.05242	0.00292976
MUC1-7986-ES	-2.97489	0.175376	0.0557021	0.552167	0.00293097
CCDC74B-55280-RI	2.97438	1.69802	1.19791	2.40693	0.00293577
SLC38A1-21328-AD	2.97317	2.43913	1.35507	4.39044	0.00294746
PLIN2-85960-AT	-2.97226	0.0114724	0.000602779	0.21835	0.00295613
B3GNTL1-44424-AP	2.96554	2.7028	1.40095	5.2144	0.00302147
IP6K2-64756-AD	2.96487	1.89887	1.24277	2.90132	0.00302808
ARHGAP28-44554-AP	-2.96348	0.539086	0.358248	0.811208	0.00304186
FOXJ3-2067-AP	-2.96261	0.479116	0.294463	0.779561	0.0030504
GPS2-38915-RI	2.96153	3.26732	1.49244	7.15297	0.00306112
U2AF1L4-49271-AD	2.96123	11.769	2.30167	60.1782	0.00306417
NDRG1-85238-ES	-2.959	0.153743	0.0444787	0.531423	0.00308635
USP6NL-10751-AT	2.95725	4.14051	1.6147	10.6174	0.00310401
RPL13-38089-RI	-2.95665	0.241362	0.0940676	0.619296	0.00311003
SPG21-31149-AP	-2.95331	0.335364	0.162415	0.69248	0.00314384
LEMD2-75766-AP	2.95323	2.07926	1.27915	3.37981	0.00314463
RAB34-39953-AP	2.95229	5.40398	1.76311	16.5633	0.00315428
LTBP3-16862-AP	2.95059	2.30059	1.32277	4.00124	0.00317164
SLC27A5-52473-AP	-2.95027	0.00242343	4.43421e-05	0.132447	0.00317498
PODNL1-47947-AP	2.94948	1.85445	1.23022	2.79541	0.00318308
ESYT2-82535-AP	-2.94863	0.463639	0.278156	0.772808	0.00319191
AURKB-39144-ES	2.94824	6.33288	1.85654	21.6022	0.00319587
UBE2W-84190-AT	-2.94822	0.00783835	0.000312116	0.196849	0.00319606
HMHA1-46371-AP	2.94799	4.04255	1.59706	10.2327	0.00319851
MICALL2-78570-AP	2.94734	4.52247	1.65789	12.3367	0.00320521
PACRGL-68894-ES	-2.94732	0.437421	0.252406	0.758056	0.00320542
ENOSF1-44459-AP	-2.94566	0.236094	0.0903549	0.616904	0.0032227
HGF-80248-AT	2.94483	2.10717	1.28309	3.46052	0.00323128
PBX3-87588-AP	-2.94401	0.0497904	0.00675732	0.366873	0.0032399
FOXM1-19720-ES	2.94288	13.7681	2.40095	78.9523	0.0032517
GAS8-38199-AP	2.94221	2.50227	1.35826	4.60983	0.00325879
TMEM51-739-ES	2.94166	2.68649	1.39068	5.18971	0.00326462
MYL6B-22371-RI	-2.94043	0.192266	0.0640595	0.577062	0.00327757
GORASP1-64155-AA	-2.93777	0.13942	0.0374501	0.519035	0.00330578
RAB34-39954-AP	-2.93731	0.191824	0.0637398	0.577294	0.00331074
NEK6-87526-AP	2.93519	2.55592	1.36587	4.78283	0.00333339
GAS8-38200-AP	-2.93445	0.398722	0.21575	0.736866	0.00334137
CHORDC1-18273-ES	-2.93033	0.00025194	9.86939e-07	0.0643138	0.00338601
COPS3-39475-AA	-2.92993	0.0276607	0.00250931	0.304911	0.0033904
PAM-72891-ES	2.9297	2.75621	1.39876	5.43102	0.00339287
CAPN3-30148-AP	2.92899	8.76572	2.05074	37.4683	0.00340067
TRABD-62790-AP	2.92835	3.15185	1.46175	6.7961	0.00340764
LRRC23-20001-ES	-2.92801	0.251265	0.0996755	0.633395	0.00341143
MRRF-87472-ES	-2.92763	0.00012927	3.22294e-07	0.051849	0.00341559
TMEM25-19020-ES	-2.92627	0.00136348	1.64241e-05	0.113191	0.00343058
LY6K-85356-AA	2.9261	2.31861	1.32005	4.07253	0.00343236
ZNF581-52118-AP	-2.92606	0.0711851	0.0121251	0.417921	0.00343288
EXOSC3-86446-ES	2.92548	22.021	2.7745	174.778	0.00343928
MTFR1-83987-ES	-2.92458	0.0012277	1.37497e-05	0.109621	0.00344924
UBC-25164-RI	-2.92298	0.000453216	2.59557e-06	0.0791365	0.00346704
NEIL2-82632-RI	2.9226	2.59724	1.3694	4.92598	0.00347124
IRAK4-21255-ES	2.92218	2.81649	1.40631	5.64076	0.00347594
ARHGAP28-44558-AP	2.92179	1.83413	1.22101	2.75512	0.00348027
AP3D1-46577-AA	-2.92172	0.15067	0.0423278	0.536325	0.00348109
SLC2A6-88069-ES	-2.92144	0.263569	0.10774	0.644779	0.0034842
NNT-71964-AP	2.91978	2.8071	1.40396	5.61255	0.00350275
PLEKHB2-55377-ES	-2.9184	0.000108852	2.37259e-07	0.0499405	0.00351833
MICALL2-78571-AP	-2.91821	0.222414	0.0810393	0.610421	0.00352047
RNF181-534110-ES	2.91668	5.20339	1.71772	15.7623	0.00353782
CDKN1C-13928-AA	-2.91638	0.0276867	0.00248538	0.308424	0.00354117
SLC39A6-45211-AD	2.916	10.9958	2.19471	55.0906	0.00354545
ESYT2-82534-AP	2.91572	2.11413	1.27813	3.49694	0.00354869
MICAL3-61015-AT	-2.91528	0.113534	0.0262955	0.490198	0.00355368
PER1-39093-AT	-2.91384	0.00083687	7.1239e-06	0.0983101	0.0035701
EPHX2-83164-ES	-2.91139	0.0120431	0.000614723	0.235938	0.00359829
ZNF606-52381-AT	-2.91035	0.078726	0.0142139	0.436035	0.00361019
EEF1G-16351-AP	-2.90981	0.312911	0.143071	0.68437	0.00361649
ERLIN2-83348-AT	-2.90884	0.333636	0.159241	0.699019	0.00362767
NPIPA5-34147-AT	2.90873	19.2977	2.62605	141.81	0.00362903
CTPS2-88576-AP	2.90804	2.77603	1.39497	5.52439	0.00363702
ORMDL2-22255-AP	-2.90796	5.62407e-05	7.68401e-08	0.0411636	0.00363793
FAM3A-90635-AA	-2.9078	0.000344125	1.59344e-06	0.0743184	0.00363981
B3GNTL1-44426-AP	-2.90738	0.353005	0.174954	0.712258	0.00364471
CXADR-60229-ES	-2.90719	0.0787871	0.0142059	0.436959	0.00364689
IGLL5-61291-ES	-2.90555	0.538784	0.355008	0.817694	0.00366603
CPSF7-16217-ES	2.9055	6.72049	1.85892	24.2963	0.00366662
SCRN1-79098-AP	-2.90141	0.168161	0.0504299	0.560743	0.00371484
NARF-44392-AP	-2.90014	0.104428	0.0226839	0.480747	0.00372991
ARFIP2-14136-ES	-2.89922	0.0115164	0.000563259	0.235465	0.00374087
AGAP1-58088-ES	2.89844	2.83736	1.40167	5.74356	0.00375029
MFSD2B-52798-AT	-2.89594	0.117895	0.0277387	0.501077	0.00378022
MAP2K5-31333-ES	-2.8958	0.112111	0.0254931	0.493031	0.00378191
DDX11-99806-ES	-2.89503	0.00952582	0.000407944	0.222436	0.00379119
NPIPA5-34149-AD	2.89301	2.52586	1.34829	4.73188	0.00381568
CPSF7-16213-AA	-2.8928	3.42801e-06	6.79766e-10	0.0172872	0.00381825
MAP7D1-1757-AP	2.89258	3.55379	1.50505	8.39133	0.00382096
FXYD5-49074-RI	-2.88894	0.29311	0.127481	0.673933	0.00386541
COMMD5-85672-AP	-2.88878	0.0615385	0.00928139	0.40802	0.00386745
RASGRP2-16664-AT	-2.88765	0.41773	0.230984	0.755456	0.00388134
VWA9-31228-AD	2.88583	2.87384	1.4031	5.88621	0.00390381
TTC14-67725-AT	-2.88113	0.15483	0.0435246	0.550778	0.00396247
MAX-27960-ES	-2.88101	0.0763998	0.0132818	0.439469	0.00396398
ARNTL2-20883-AD	2.88088	7.09165	1.87048	26.8869	0.00396571
MORF4L2-89765-AP	-2.88083	0.140513	0.0369718	0.53403	0.00396629
USP6NL-10750-AT	-2.8799	0.262251	0.105466	0.652107	0.00397802
MCCC2-72445-ES	-2.87885	0.132409	0.0334277	0.52448	0.00399126
EEF1G-16350-AP	2.87844	3.10664	1.43577	6.72198	0.00399652
SDSL-24644-ES	-2.87842	0.335221	0.159265	0.705571	0.00399673
ENOSF1-44460-AP	2.87666	3.76978	1.52635	9.31063	0.00401908
SMIM11-60477-AP	-2.87613	9.97133e-05	1.87096e-07	0.0531423	0.00402587
ZZZ3-3527-ES	-2.87523	0.0163564	0.000990856	0.270001	0.00403727
PRIMPOL-71304-AA	-2.87455	0.22457	0.0811114	0.621759	0.00404604
PRR13-22030-AA	-2.87358	0.000110368	2.20701e-07	0.0551923	0.00405853
SYK-86820-AP	-2.87308	0.451851	0.262808	0.776876	0.00406496
PRKAR1A-43143-AP	2.87146	2.47697	1.33366	4.60043	0.00408579
TFAP2C-59883-AP	-2.87108	0.142094	0.0375037	0.538363	0.00409069
MXRA7-43610-AP	-2.86987	0.27691	0.115209	0.665566	0.00410645
TMEM219-35991-AP	-2.8698	0.269212	0.109868	0.659657	0.00410729
TMUB2-41795-AD	-2.86922	0.000568369	3.44921e-06	0.0936569	0.00411482
IFT122-66729-ES	2.86793	2.65213	1.36178	5.16515	0.00413162
AMMECR1-89875-AP	-2.86793	2.71255e-06	4.25705e-10	0.0172842	0.00413167
DHRS4-26781-ES	-2.86547	0.00349881	7.31098e-05	0.167442	0.00416394
REPS2-88583-ES	2.8643	2.69323	1.36725	5.30516	0.00417939
DLK2-76269-AP	-2.86252	0.353679	0.173597	0.720569	0.00420282
SEPT6-89962-AP	-2.86183	0.00135348	1.46853e-05	0.124744	0.00421206
MDFI-76115-AP	2.86114	2.69407	1.36636	5.3119	0.00422115
ATXN3-28932-ES	-2.86053	0.00439245	0.000106549	0.181077	0.0042293
IWS1-55222-AD	-2.85919	0.000394554	1.83127e-06	0.0850083	0.00424722
ITGB6-55717-ES	2.85737	28.2666	2.85625	279.737	0.0042717
FUT3-46948-AA	-2.85655	0.33419	0.15754	0.708917	0.00428271
ZSCAN20-1679-AT	2.85512	4.10339	1.55681	10.8155	0.00430206
P4HA1-12122-ME	-2.85416	0.181594	0.0562761	0.585976	0.00431508
ARHGEF38-70245-AT	-2.85347	0.254329	0.0993069	0.651346	0.00432445
NUDT1-78611-ES	2.85026	25.9578	2.76539	243.658	0.00436831
TSPAN4-13799-ES	-2.84898	0.0961439	0.0191964	0.481531	0.00438599
PDK1-55973-AP	2.84782	2.38833	1.31183	4.34821	0.00440196
CENPK-72215-ES	2.84743	123.564	4.48728	3402.51	0.00440744
MPPED2-14793-AT	-2.84702	0.625935	0.453372	0.864179	0.00441301
DNAJC12-11904-ES	-2.84672	0.605224	0.428318	0.855198	0.00441721
B4GALT2-2517-AD	-2.84604	0.385848	0.200261	0.743423	0.00442661
SNCA-69930-ES	-2.84544	0.00494079	0.000127428	0.191571	0.00443501
ERLIN2-83347-AT	2.84489	2.92045	1.39567	6.11105	0.00444264
NASP-2717-ES	-2.84379	0.0678762	0.0106298	0.433419	0.00445807
FAM189B-8049-ES	-2.84213	0.00590243	0.000171359	0.203308	0.00448138
SLC17A5-76763-ES	-2.84203	0.167932	0.0490636	0.574789	0.00448269
TFAP2C-59884-AP	2.84158	6.87444	1.81868	25.9847	0.00448911
PRKACB-3587-AT	2.8411	46.5243	3.29012	657.881	0.00449585
FUT3-46947-AA	-2.84051	0.41249	0.223896	0.759941	0.00450415
VPS29-24444-ES	2.84048	12.3265	2.17846	69.7476	0.0045045
ERBB2IP-72260-ES	-2.83806	0.069457	0.0110104	0.438155	0.00453891
ANKRD11-38073-AP	-2.83736	0.458101	0.267155	0.785524	0.00454887
SEC61G-79735-AD	2.83679	5.02851	1.64744	15.3487	0.00455691
MSANTD2-19241-AP	2.83639	2.84945	1.38203	5.87494	0.00456261
IP6K2-64757-ES	2.83603	2.22488	1.28022	3.86659	0.00456785
NARF-44391-AP	2.83558	9.44986	2.00082	44.6316	0.00457424
SEC22C-64286-AP	2.83395	5.49601	1.69134	17.8593	0.0045976
ICAM3-47505-AA	-2.83389	0.0440083	0.00507437	0.381669	0.00459846
AURKA-59853-ES	2.83384	2.4327	1.3154	4.49903	0.00459921
C19orf54-49958-AP	2.83266	4.85783	1.62735	14.5012	0.00461626
HPS4-61506-AD	2.83222	2.76001	1.36707	5.57225	0.00462264
CHRNB1-38960-AP	2.83069	2.45976	1.31898	4.58719	0.00464483
AMDHD2-33282-RI	-2.82994	0.232542	0.0846744	0.638633	0.00465574
ZNF33A-11309-AT	-2.82978	0.230826	0.0836148	0.637218	0.00465807
TFPT-51789-AA	-2.82922	0.000140443	3.01058e-07	0.0655165	0.00466618
LETM2-83399-AT	2.82875	2.75345	1.36489	5.55464	0.00467305
ZZZ3-3525-AP	2.82846	2.29789	1.29106	4.08986	0.00467727
ATPAF2-39536-ES	-2.82634	6.56177e-08	6.85307e-13	0.00628285	0.00470834
MPPED2-14794-AT	2.82476	1.58989	1.15252	2.19323	0.00473154
ZNF595-68342-AT	-2.82424	1.33873e-08	4.60024e-14	0.00389589	0.0047393
FYN-77272-AP	-2.82375	0.586793	0.405313	0.849532	0.00474661
NPRL3-32820-ES	-2.82237	0.000399752	1.74559e-06	0.0915461	0.00476701
HNRNPK-86709-AP	-2.82194	0.0343047	0.00329679	0.356957	0.00477338
OS9-22712-ES	-2.82068	0.169844	0.0495502	0.582174	0.00479217
CPSF7-16198-AD	2.81905	6.21812	1.74527	22.1542	0.00481662
LETM2-83398-AT	-2.81898	0.363641	0.179979	0.734726	0.00481763
PDK1-55972-AP	-2.8189	0.425475	0.234873	0.770753	0.00481878
C17orf62-44358-ES	2.81889	2.39833	1.30545	4.40614	0.00481898
ZNF211-52309-AP	-2.81863	0.0808722	0.014071	0.464807	0.00482292
C16orf52-35532-AT	-2.81734	0.212214	0.0721815	0.623911	0.00484229
PAM-72894-ES	2.81229	2.86179	1.37529	5.95499	0.00491895
RGS19-60191-AP	2.81227	2.53343	1.32541	4.84248	0.00491928
SSFA2-56439-AP	2.81208	2.73269	1.35611	5.50663	0.00492222
SRSF2-43667-AD	2.81166	14.5821	2.25185	94.4279	0.00492862
C19orf60-48492-AA	-2.80994	0.0606336	0.00858305	0.428337	0.00495514
PREPL-53429-AP	2.80611	2.25775	1.27834	3.98754	0.00501443
TDRKH-7657-AP	-2.80579	0.41523	0.224723	0.767239	0.00501941
LTBP3-16864-AP	-2.80578	0.312887	0.138961	0.704502	0.0050195
SIK3-18878-ES	2.80423	3.53187	1.46213	8.53145	0.00504373
SPG21-31148-AP	2.80258	2.69688	1.34754	5.39736	0.00506958
MAN2A2-32516-ES	-2.80198	0.0441577	0.00497965	0.391575	0.00507902
FAM185A-81134-ES	-2.80021	0.308553	0.135486	0.702693	0.0051069
SERPING1-15872-ES	-2.79991	9.37388e-06	2.83279e-09	0.0310187	0.00511169
RGS19-60190-AP	-2.79925	0.393805	0.205073	0.756231	0.00512209
TTC14-67724-AT	2.7992	5.67801	1.68313	19.1547	0.00512297
YAF2-21209-ES	-2.79899	0.00478252	0.000113464	0.201584	0.00512634
DGKA-22295-AP	-2.79863	0.404862	0.214928	0.762644	0.00513204
KCTD10-24296-AA	-2.79796	0.253116	0.0966821	0.662663	0.00514268
PRKACB-3588-AT	-2.79672	0.0385178	0.00393079	0.377436	0.0051625
CABYR-44863-AA	-2.79521	0.0210943	0.00140958	0.315674	0.00518662
STX5-16450-AA	-2.79516	0.0112448	0.000483367	0.261591	0.00518742
MFSD11-43684-RI	-2.79429	0.169741	0.0489266	0.588881	0.00520136
SH2B1-35884-AD	2.79367	2.0392	1.23695	3.36177	0.00521129
RPL38-43233-AD	2.79309	59.9274	3.39026	1059.3	0.0052207
COX16-28178-ES	-2.79276	0.0117886	0.000522408	0.26602	0.00522606
HDDC3-32522-RI	-2.792	0.412438	0.221484	0.768023	0.00523837
NFKBIB-49719-AA	-2.79091	0.00407793	8.55714e-05	0.194335	0.00525604
SYT17-34290-AP	2.79072	2.79059	1.3573	5.73739	0.0052591
CYB5R2-14208-ES	2.78957	14.847	2.2307	98.8181	0.00527779
TMX3-45749-AP	-2.78823	0.0106269	0.000435599	0.259255	0.00529963
FAM49B-85156-ES	-2.78768	0.0025945	3.94393e-05	0.170679	0.00530862
KANK1-85709-AP	-2.78713	0.56215	0.374924	0.842871	0.00531774
YY1AP1-8095-AP	-2.78678	0.264755	0.103974	0.674159	0.00532345
MLLT4-78446-AT	-2.78575	0.0409915	0.00433141	0.387934	0.00534042
CAPG-54271-AP	2.78543	4.92293	1.60377	15.1115	0.00534575
DMPK-50523-ES	2.78385	3.89971	1.49595	10.166	0.00537184
HMOX2-33747-ES	-2.78357	7.46278e-06	1.83152e-09	0.0304082	0.00537647
KRTCAP3-53011-AP	-2.78337	0.0721966	0.0113428	0.45953	0.0053797
CSNK1A1-74045-AD	2.78312	4.02506	1.50963	10.7318	0.00538394
ETFA-31933-ES	-2.78284	0.425542	0.233134	0.776747	0.00538852
KIFC3-36603-AP	2.78268	2.06121	1.23843	3.43061	0.00539119
CATSPERG-49635-ES	-2.78191	0.496798	0.303478	0.813267	0.00540401
PXMP2-25282-AT	2.78053	14.3248	2.19368	93.5415	0.00542709
HEATR1-10395-AT	-2.77826	0.000154817	3.17595e-07	0.0754685	0.00546507
THY1-19142-AP	-2.7782	0.012838	0.000594406	0.277277	0.00546608
CIZ1-87718-ES	-2.77782	0.165592	0.0465598	0.588935	0.00547254
LEPR-3295-AT	2.77714	3.59159	1.45678	8.85482	0.00548391
TATDN3-9764-ES	2.77677	865.101	7.31075	102370	0.00549012
FBXO5-78210-AP	-2.77642	0.406913	0.215693	0.767657	0.00549614
ZNF581-52119-AP	2.77592	8.16714	1.85393	35.9787	0.00550459
ABCD4-28381-ES	-2.77562	0.00222454	2.97876e-05	0.166129	0.0055096
PTPRA-58566-AP	-2.77533	0.13828	0.0341946	0.559194	0.00551453
GALT-86201-AA	-2.77507	0.00030914	1.02621e-06	0.0931264	0.00551899
PDS5B-25604-ES	2.775	21.8649	2.47452	193.198	0.00552024
IFT74-86038-AP	2.77487	3.55757	1.45164	8.7186	0.00552233
CAPG-54272-AP	-2.77479	0.204582	0.0666963	0.627529	0.00552369
SPTBN1-53578-AT	-2.77468	0.0207838	0.00134713	0.320656	0.00552554
CSF2RA-88369-ES	2.77441	2.1514	1.2522	3.69631	0.0055302
HYAL1-64998-RI	-2.77327	0.138276	0.0341572	0.559772	0.00554965
PAM-72890-ES	2.77317	14.5251	2.1917	96.2631	0.00555132
MTHFD2L-69496-AT	-2.77293	0.236048	0.0850793	0.654901	0.00555535
METTL23-43630-ES	2.77189	2.53563	1.3133	4.89563	0.00557314
ZSCAN29-30240-AA	-2.77165	0.24878	0.0930186	0.665369	0.00557729
KSR1-39847-AP	2.77134	3.23987	1.41081	7.44021	0.00558262
TDRKH-7658-AP	2.77008	2.37211	1.28739	4.37081	0.00560431
CARD8-50720-ES	2.7687	6.01968	1.68932	21.4504	0.00562811
ZHX1-85052-AD	2.7669	2.39759	1.2905	4.45445	0.00565924
SMARCD1-21643-ES	-2.76678	0.0347216	0.00321198	0.375342	0.00566132
EPS15L1-48152-AP	-2.76564	0.348438	0.165058	0.735553	0.00568113
PRSS16-75702-ES	-2.76529	0.0601599	0.00820565	0.441064	0.00568719
RPP38-91487-AD	2.76448	2.72542	1.33881	5.54814	0.00570142
TSC22D2-67269-ES	-2.76418	0.179592	0.0531538	0.606792	0.00570652
TMEM219-35990-AP	2.76176	3.39865	1.42643	8.09774	0.00574901
TMEM205-47659-AD	-2.76081	0.110681	0.0231975	0.528092	0.00576589
FAM177A1-27187-RI	-2.76044	0.300361	0.127868	0.705549	0.00577244
ZNF783-82181-AP	2.76021	3.06575	1.38375	6.79228	0.00577647
ABHD17A-46554-AP	2.75956	2.01156	1.22448	3.30457	0.00578789
REPIN1-82246-ES	-2.75893	0.489482	0.294662	0.813112	0.00579917
PXMP2-25283-AT	-2.75818	0.0713964	0.010942	0.46586	0.00581249
OBSL1-57734-AD	-2.75804	0.0876355	0.015535	0.494367	0.00581487
UBALD1-33773-ES	-2.75692	0.00017277	3.65249e-07	0.0817233	0.00583484
FXYD3-49023-AP	2.75613	2.02954	1.22687	3.35736	0.005849
GANC-30141-AT	-2.75546	0.271716	0.107548	0.686485	0.00586103
ATP5J-60268-ES	-2.75398	0.326214	0.146984	0.723994	0.00588752
MRPL10-42097-AP	-2.7528	0.023536	0.00163089	0.339657	0.00590877
SSFA2-56438-AP	-2.75085	0.384896	0.194941	0.759948	0.00594413
EPS15L1-48151-AP	2.74942	2.78381	1.34175	5.77575	0.00597005
C1orf86-244-AP	-2.74883	0.107561	0.0219384	0.527353	0.00598081
PXN-24743-AP	-2.74826	0.226254	0.0784002	0.652944	0.00599127
AGAP3-82348-AP	-2.74823	0.164182	0.04526	0.595573	0.00599188
ZCCHC9-72664-AD	2.74806	8.59221	1.85304	39.8405	0.00599491
SYT17-34292-AP	-2.74791	0.345081	0.161563	0.737058	0.00599758
C15orf57-29987-AT	2.74773	35.2241	2.77634	446.896	0.00600099
GJD3-40862-AT	-2.74762	0.503282	0.308393	0.821332	0.00600294
STRN3-27097-ES	2.74714	9.75972	1.92096	49.5857	0.00601167
CCDC64B-33363-AP	2.74679	3.69839	1.45449	9.40408	0.00601809
KAZN-734-AT	2.74652	2.59883	1.31458	5.13771	0.00602308
RAD23A-47894-ES	2.7455	2.99593	1.36881	6.5572	0.00604179
SIPA1-16886-AP	2.74486	2.29276	1.26778	4.14642	0.00605374
S100PBP-1637-AA	-2.74459	0.240495	0.0869249	0.665379	0.00605857
LEPR-3297-AT	-2.74411	0.296367	0.124334	0.706435	0.00606754
HNRNPK-86708-AP	2.74396	24.8793	2.50504	247.093	0.00607025
DLK2-76270-AP	2.74369	2.67273	1.32421	5.39451	0.00607528
ZNF169-86927-AT	2.74365	6.34399	1.69506	23.7433	0.00607599
IER3IP1-45442-AT	-2.74362	0.00497209	0.000112464	0.219819	0.00607656
MXRA7-43608-AP	2.74168	3.40936	1.41866	8.19346	0.00611257
CAMKK2-24848-AP	2.7404	2.17402	1.24753	3.78859	0.00613637
CORO1B-17210-AP	2.74024	2.60357	1.31321	5.16186	0.00613937
EPG5-45357-AT	-2.74001	0.000146971	2.66445e-07	0.0810697	0.0061437
YJEFN3-48655-AT	-2.73865	0.440351	0.244837	0.791992	0.0061692
FAM115A-82126-AD	2.73814	5.88475	1.65484	20.9266	0.00617871
ARMC7-43355-AA	-2.73796	0.1382	0.0335154	0.569868	0.00618214
PNKP-51101-AP	-2.73721	0.505018	0.309643	0.823668	0.00619621
MAX-27961-ES	-2.73621	0.160444	0.0432604	0.595051	0.00621505
GFER-33180-AP	-2.73619	0.28174	0.113702	0.698116	0.00621544
KAZN-733-AT	-2.73569	0.383577	0.193066	0.762076	0.006225
PSRC1-4005-ES	2.73531	3.468	1.42263	8.45411	0.00623208
MYC-85135-AA	-2.73467	0.193919	0.059848	0.628332	0.00624425
CUL7-76216-AP	2.7339	2.53951	1.30191	4.95357	0.00625888
PNKP-51102-AP	2.73239	1.97011	1.2113	3.20427	0.00628759
PSMA2-79316-AT	2.73199	8.89306	1.85434	42.6495	0.00629539
RBM42-95124-AA	-2.731	0.00486323	0.000106388	0.222309	0.00631428
PPCDC-31830-ES	-2.73026	0.00309064	4.87791e-05	0.195822	0.0063285
SNRNP35-25076-AP	2.73005	8.06825	1.80211	36.1225	0.00633253
CHRNB1-38958-AP	-2.72999	0.505593	0.309848	0.824999	0.00633359
FAM98C-49642-ES	-2.72885	0.0153161	0.000761467	0.308066	0.00635556
TMEM25-19006-AP	-2.7288	0.408031	0.214325	0.776807	0.00635646
ZNF211-52308-AP	2.72798	11.4976	1.98882	66.4691	0.00637233
RPAIN-38695-ES	2.72697	7.2821	1.74793	30.3381	0.00639186
BPHL-75167-ES	2.72665	2.2973	1.26348	4.17703	0.00639804
GRIK3-1790-AT	-2.72635	0.520949	0.325987	0.832512	0.00640399
PDP2-36883-RI	-2.72594	0.0720469	0.0108702	0.477523	0.00641179
GJD3-40861-AT	2.72584	1.98901	1.21313	3.26111	0.0064139
COMMD5-85671-AP	2.72236	12.5242	2.02967	77.2818	0.00648172
RNASE1-26469-ES	2.72224	3.72167	1.44483	9.58649	0.00648412
LTA4H-23822-ES	2.72179	2.71271	1.32223	5.56541	0.00649301
HSPH1-25576-ES	-2.71804	0.00816095	0.000254631	0.26156	0.0065669
EPHB6-82064-AP	-2.718	0.13096	0.0302347	0.567251	0.00656777
CAMTA2-38627-AP	2.71771	2.76269	1.32755	5.74928	0.00657346
EP400NL-25252-ES	-2.7172	0.443676	0.246881	0.79734	0.0065837
TSPAN32-13907-AT	-2.71694	0.131008	0.0302362	0.567633	0.00658889
KRTCAP3-53012-AP	2.71668	14.3176	2.09875	97.6742	0.00659406
PIGL-39428-AT	2.71448	15.3826	2.1377	110.691	0.006638
SLAMF8-8418-ES	-2.71404	0.136208	0.032282	0.574705	0.00664684
PLAC8-69772-AT	-2.71382	0.00596654	0.000147677	0.241064	0.00665128
MUTYH-2595-AP	-2.71265	0.311525	0.134131	0.723532	0.00667468
CKMT1B-30280-AT	-2.71055	0.0955345	0.0174875	0.521906	0.00671709
STOML1-31621-ES	-2.71007	0.223011	0.0753404	0.660125	0.00672683
ZNF283-50248-AT	2.70944	6.39471	1.67072	24.4759	0.0067397
HYAL4-81634-AP	-2.70825	0.131416	0.0302559	0.570799	0.00676393
FAM118A-62656-AP	2.70792	1.7607	1.16913	2.65161	0.00677053
RBM42-49226-ES	-2.70725	0.000136934	2.18507e-07	0.0858142	0.00678438
NTPCR-10316-AT	2.70678	9.74724	1.8743	50.6903	0.00679392
CCDC14-66493-ES	2.70347	1.71014	1.15901	2.52333	0.00686202
ANAPC10-96806-ES	-2.70338	0.0214836	0.00132702	0.347807	0.00686383
TPD52L1-77417-ES	2.70121	9.74393	1.86776	50.8333	0.00690885
MDFI-76117-ES	-2.70071	0.00133408	1.0936e-05	0.162743	0.00691926
SNRPD2-50506-AP	2.69887	2.20583	1.24184	3.91813	0.00695748
ARHGAP15-55491-AT	-2.69878	0.122062	0.0264982	0.562267	0.00695938
CCL4L1-40426-RI	-2.69705	0.131955	0.0302855	0.574935	0.0069957
SEC22C-64287-AP	-2.69622	0.191318	0.0574966	0.636604	0.00701313
ABL2-9103-AT	-2.69614	0.0348211	0.00303272	0.399809	0.00701483
BTF3L4-2997-ES	-2.69598	0.0137797	0.000611613	0.310459	0.00701824
MIEF2-39602-AA	2.69598	3.40511	1.39725	8.29826	0.00701824
RDX-18641-ES	-2.69575	0.132006	0.0302842	0.575405	0.00702312
EBPL-25911-ES	2.69556	69.25	3.17861	1508.7	0.00702697
ZNF33A-11311-ES	-2.69533	0.0211539	0.00128134	0.349233	0.00703181
ABHD17A-46553-AP	-2.69502	0.489326	0.290977	0.822885	0.00703845
PLEKHM1-41969-AP	2.69314	8.99446	1.81848	44.4879	0.00707831
SARS2-49729-RI	-2.69138	7.46855e-05	7.37849e-08	0.0755971	0.0071158
SMIM7-48187-RI	-2.69022	0.156286	0.040425	0.604215	0.00714056
DNASE1-33614-RI	-2.68872	0.165301	0.0445073	0.613931	0.00717265
ARMC8-66963-ES	-2.68871	0.0101191	0.000355608	0.287948	0.00717281
KDM2B-24876-AT	-2.68533	0.041465	0.00406217	0.423258	0.00724579
PICALM-18169-ES	-2.68533	0.34476	0.158474	0.750021	0.00724592
YPEL3-36068-AP	-2.68356	0.569398	0.377383	0.859113	0.00728434
DGCR6L-61146-ES	-2.68317	0.00214293	2.40659e-05	0.190816	0.00729278
KARS-37643-ES	2.68286	5.69815	1.5982	20.3159	0.00729955
GRIK3-1791-AT	2.68239	1.89518	1.18789	3.02359	0.00730977
CUL7-76215-AP	-2.68232	0.400256	0.205006	0.781462	0.0073113
BCS1L-57517-AD	-2.68163	0.0177299	0.000930494	0.337831	0.00732637
ZNF33A-11308-AT	2.68119	3.76271	1.42826	9.91276	0.00733602
RALGDS-88016-AP	-2.68095	0.184112	0.0534323	0.634395	0.00734141
TMEM150A-54299-AP	-2.6801	0.382176	0.189135	0.772244	0.00735991
CDIPT-35968-AP	2.68002	2.12321	1.22421	3.68238	0.00736175
SPOP-42315-ES	2.67929	4.81149	1.52467	15.1839	0.00737778
LYNX1-85364-AP	2.67908	3.39157	1.38794	8.28765	0.00738242
RCHY1-69525-ES	-2.67875	0.000278203	6.96316e-07	0.111152	0.00738969
GMPPA-95769-AD	2.67731	10.864	1.89487	62.2872	0.00742151
LRRN2-9486-AP	-2.67586	0.352668	0.164372	0.756663	0.00745374
HARS2-73763-AA	-2.67567	0.136069	0.0315666	0.586532	0.00745797
CAPN2-9923-AP	2.67517	8.02079	1.74479	36.8716	0.00746911
TRIM7-75045-AP	2.6751	2.0796	1.2162	3.55594	0.00747063
COL1A1-316114-ES	-2.67462	0.288868	0.116279	0.717627	0.00748132
PFKM-21429-ES	-2.67334	0.389505	0.195117	0.777551	0.00751002
C6orf203-77125-ES	2.67303	2.90955	1.32963	6.36677	0.00751693
CIDEB-26957-AP	-2.67224	0.415948	0.218586	0.79151	0.00753468
ANKRD54-62161-AP	2.67094	2.06629	1.21311	3.51949	0.00756385
ASTE1-66776-RI	-2.67061	0.0438082	0.00441155	0.43503	0.00757134
CPSF7-16215-ES	2.67049	10.702	1.87891	60.9566	0.00757396
PRR19-50150-RI	-2.66933	0.443705	0.244327	0.80578	0.00760029
APTX-86071-AP	2.66918	4.11998	1.45673	11.6522	0.00760373
YJEFN3-48656-AT	2.66894	2.13735	1.22357	3.73357	0.00760905
CCL4L1-40441-ES	-2.6689	0.60566	0.419087	0.875294	0.00761005
PTPRA-58565-AP	2.66865	6.46654	1.64165	25.472	0.00761574
FAM76A-1344-ES	-2.66782	0.43556	0.23652	0.802099	0.0076345
REPIN1-82230-AP	-2.66773	0.386747	0.192448	0.777215	0.0076365
PAM-72897-ES	2.66769	3.20632	1.3622	7.54698	0.00763744
ZNF268-25382-ES	-2.66744	0.0622491	0.00809269	0.478822	0.00764327
CIDEB-26958-AP	2.6672	2.39519	1.26063	4.55088	0.00764859
C10orf137-13425-ES	2.66716	3.64326	1.40889	9.42111	0.00764963
RPS6KA1-1281-AP	-2.66715	0.34265	0.155968	0.752779	0.00764978
KANK3-47221-AT	2.66609	2.61836	1.29038	5.31304	0.00767393
ARRB2-38562-AA	-2.66577	0.00129275	9.72307e-06	0.171879	0.00768114
AFMID-43841-ES	2.6656	2.85952	1.32066	6.19152	0.0076851
NNT-71965-ES	-2.66488	0.00572292	0.000128349	0.255179	0.00770161
PAM16-33651-AT	-2.66449	0.000643344	2.8892e-06	0.143255	0.00771049
KRT222-40884-AT	-2.66442	0.000534044	2.09106e-06	0.136392	0.00771205
BRD9-71470-AA	-2.66359	0.00781618	0.000220083	0.277589	0.00773113
CD3G-18994-ES	-2.6634	0.133519	0.030342	0.58755	0.00773545
CYB561A3-16167-ES	-2.66259	0.00579476	0.000130731	0.256857	0.00775416
SLC50A1-7944-ES	2.6616	10.3681	1.85247	58.0294	0.00777709
CXCL12-11342-AT	2.66092	1.96446	1.19467	3.23028	0.00779284
BBIP1-13087-AP	-2.65814	0.0368786	0.00323591	0.420295	0.00785725
ABLIM2-68748-AA	-2.65482	0.329247	0.144986	0.747686	0.00793505
ID2-52599-AT	-2.65435	0.00422261	7.45283e-05	0.239244	0.00794603
C1orf86-245-AP	2.65361	9.3149	1.79201	48.4189	0.00796353
TLCD1-39969-AP	-2.65281	0.234641	0.0803974	0.684803	0.00798252
IRF3-50997-AD	-2.65246	0.517452	0.318011	0.841972	0.00799066
ATP5G2-22104-AD	-2.65098	5.61892e-06	7.37698e-10	0.0427984	0.00802595
GTF2IRD1-80080-AP	-2.6509	0.359422	0.16867	0.765899	0.00802767
SLC26A1-68436-AT	2.64991	1.76136	1.15881	2.67723	0.00805125
CHMP3-54441-ES	-2.64984	0.00560895	0.000121293	0.259374	0.00805288
RINT1-81296-ES	-2.64939	0.0801263	0.0123825	0.518491	0.00806382
ARHGEF1-50100-ES	2.64859	92.9086	3.24854	2657.2	0.00808288
NDE1-34184-AT	2.64843	2.62402	1.28502	5.35825	0.00808675
MRPL10-42098-AP	2.64835	25.3977	2.31818	278.253	0.0080886
NF2-61661-ES	-2.64773	0.208081	0.0650965	0.665128	0.00810335
SHC1-7855-AP	2.64688	1.83612	1.17081	2.87949	0.00812388
C20orf196-58657-AT	2.64639	2.58977	1.27995	5.23999	0.00813548
KANK3-47222-AT	-2.64433	0.394692	0.198156	0.786158	0.00818528
GTF2IRD1-80081-AP	2.64336	2.72018	1.29526	5.71264	0.00820866
ANXA8L1-11446-ES	-2.64313	0.00234028	2.6212e-05	0.208947	0.00821427
NR4A3-87062-AT	-2.64282	0.13076	0.0289225	0.591172	0.00822191
RPS6KA1-1280-AP	2.6426	2.47463	1.26372	4.84586	0.00822727
SHC1-7854-AP	-2.64242	0.544617	0.34701	0.854752	0.00823147
ASH2L-83369-AP	2.64071	5.39214	1.54398	18.8314	0.00827319
EXOSC9-70503-AA	2.64025	8.68224	1.74521	43.1932	0.0082845
C17orf62-44357-ES	2.64	4.52091	1.47496	13.8571	0.00829055
CTDNEP1-38876-AP	-2.63964	0.116692	0.0236761	0.575142	0.00829949
GOLGA7-83513-AA	2.6392	13.5879	1.95719	94.3353	0.00831022
CUL7-76217-AD	2.63872	3.79291	1.40906	10.2098	0.00832199
NAGPA-33872-ES	-2.63842	0.000495463	1.73735e-06	0.141298	0.00832921
SMUG1-22121-AP	2.63713	10.3093	1.82045	58.3826	0.00836113
SAR1B-73415-AP	2.63449	2.82685	1.30482	6.12427	0.00842635
ANXA11-12350-ES	2.63447	11.701	1.87715	72.9365	0.00842685
ANKRD11-38074-AP	2.63388	2.19142	1.22231	3.92891	0.00844151
UGGT2-26132-ES	-2.63245	0.0614125	0.00769247	0.490284	0.00847712
VWA9-31227-AD	2.63207	3.99099	1.42393	11.186	0.00848661
TMUB2-41809-ES	-2.632	0.418919	0.21915	0.800788	0.00848851
LSP1-13865-AP	-2.63151	0.352853	0.16242	0.766563	0.00850057
CLSPN-1732-AA	-2.63062	0.0433128	0.00417653	0.449177	0.00852304
ILK-14175-RI	-2.63034	0.0510552	0.00556355	0.46852	0.00853001
ORC4-55523-AP	2.62937	3.04071	1.32727	6.96613	0.00855436
H3F3A-10005-AP	2.62933	2.10929	1.20925	3.67922	0.00855544
NFATC3-37183-AT	-2.62908	0.0045237	8.08502e-05	0.253109	0.00856152
VAC14-37411-AP	-2.62857	0.110539	0.0213957	0.571094	0.00857441
ZNF219-26527-AP	-2.62828	0.441362	0.239834	0.812231	0.0085819
FAM49B-85144-ES	-2.62806	0.124924	0.0264811	0.589322	0.0085874
GATAD2A-48635-AA	-2.62687	0.0929508	0.0157923	0.547094	0.00861744
C20orf196-58656-AT	-2.62628	0.392482	0.195295	0.788766	0.00863248
DDX17-62237-AP	-2.62466	0.467555	0.265021	0.82487	0.00867364
BBIP1-13095-ES	-2.62389	2.60438e-15	3.32407e-26	0.00020405	0.0086933
DNAJB5-86220-AP	2.62342	6.2066	1.58676	24.2772	0.00870526
GADD45B-46609-AT	-2.62245	0.0331877	0.00260367	0.423027	0.00873003
PRR5-62618-AA	-2.62148	0.112584	0.0219942	0.576297	0.00875496
RAB3IP-23355-AD	-2.62029	0.0110112	0.000377692	0.321021	0.00878553
CAMKK2-24845-AP	-2.62012	0.444209	0.242085	0.815093	0.00878986
SETMAR-62993-RI	-2.61968	0.214793	0.0679605	0.678862	0.00880121
SKP2-71799-ES	-2.61873	0.00230974	2.45665e-05	0.217161	0.00882585
S100A8-7703-AP	-2.61871	0.0217696	0.00124114	0.381839	0.00882628
TC2N-28884-AP	2.6182	2.96983	1.31476	6.70833	0.00883962
PMF1-8202-ES	-2.61608	0.531582	0.331106	0.85344	0.00889465
POLR2F-62179-AT	2.61583	2.85556	1.30093	6.26799	0.00890116
SEPN1-1195-ES	-2.61512	0.175146	0.0474621	0.646326	0.00891956
SOCS2-23707-AP	2.6145	2.22427	1.22157	4.05	0.00893573
CAPN2-9924-AP	-2.61434	0.128724	0.0276806	0.598611	0.00893988
COA1-79335-AT	2.61382	4.81338	1.48155	15.6381	0.00895365
FGD3-86893-RI	2.61371	1.78102	1.15531	2.74562	0.00895655
BSDC1-1600-ES	-2.61339	0.19752	0.0585251	0.666624	0.0089648
GFER-33179-AP	2.61329	3.21474	1.33902	7.71801	0.00896755
ENAH-9992-AA	-2.61328	0.132325	0.0290319	0.603131	0.00896776
POLM-79464-AD	2.61282	5.20571	1.51017	17.9447	0.00897983
ZMYND8-59712-ES	2.61251	4.62488	1.46597	14.5906	0.00898812
SLC35A2-89041-AD	-2.61214	0.00341255	4.80921e-05	0.24215	0.00899784
MPHOSPH8-25400-AT	-2.61211	0.171377	0.0456203	0.643793	0.0089985
NDE1-34185-AT	-2.61154	0.390376	0.192705	0.790815	0.00901342
DALRD3-64809-RI	-2.61146	0.168032	0.0440585	0.640845	0.00901556
ITGB3-42067-AT	2.61105	1.69763	1.14107	2.52564	0.00902645
ARHGAP4-90525-ES	-2.6106	0.186636	0.0529274	0.65813	0.0090384
MSL1-40845-RI	2.61021	5.55017	1.53256	20.0999	0.00904868
CDC27-42052-ES	-2.60969	0.0913963	0.0151548	0.551196	0.00906247
C20orf96-58437-AT	2.60807	4.37021	1.44266	13.2385	0.00910546
CDK10-38108-AP	2.60779	6.79508	1.60966	28.685	0.00911282
SMYD3-10490-AT	-2.60776	0.000139801	1.77222e-07	0.110282	0.00911372
TBCB-49357-RI	2.60736	2.98883	1.31239	6.8067	0.00912442
HVCN1-24493-AD	-2.60693	0.0249705	0.001558	0.400209	0.00913582
LRRN2-9485-AP	2.60676	2.72875	1.28284	5.80438	0.00914028
DENND2D-4142-AP	2.60656	2.78812	1.28963	6.02778	0.00914567
PYHIN1-8389-AT	2.60651	2.07679	1.19875	3.59794	0.00914706
PAPOLA-29208-RI	-2.60641	0.411645	0.21118	0.802404	0.00914963
MORF4L2-89764-AP	2.60621	4.87484	1.48112	16.0447	0.00915505
PALB2-94082-ES	-2.6055	0.0262117	0.00169365	0.405665	0.00917401
C11orf48-16385-AP	2.60455	14.4841	1.93777	108.264	0.00919961
DENND2D-4141-AP	-2.60276	0.363331	0.16951	0.778771	0.00924777
UBE2D3-70141-AD	2.60266	3.30821	1.34372	8.14478	0.00925035
SAFB-46853-AA	-2.60259	0.043229	0.00405883	0.460415	0.00925232
SUSD4-9911-AT	-2.60215	0.328727	0.142204	0.759904	0.00926404
POLR2J3-81115-ES	-2.60186	0.204277	0.0617465	0.675813	0.00927198
CLNK-68788-AT	2.60176	2.78806	1.28779	6.03612	0.00927463
ZFP64-59815-AA	2.60015	4.62363	1.45789	14.6636	0.00931836
MRPL55-10177-AD	2.59836	11.0937	1.8062	68.1371	0.00936708
SREBF1-39507-ES	-2.59801	0.496699	0.29297	0.8421	0.00937665
RNF166-38014-AP	2.59745	1.80943	1.15667	2.83059	0.00939189
SEC61A2-10762-ES	2.59676	8.28593	1.67958	40.8772	0.00941085
C16orf52-35533-AT	2.59656	3.74087	1.3819	10.1268	0.00941625
FGF11-38956-RI	-2.5959	0.395818	0.196605	0.796885	0.00943435
RPS6KA4-16648-AA	-2.59589	0.068541	0.00905863	0.518607	0.00943469
NAT6-64991-AA	-2.595	0.454193	0.250242	0.82437	0.00945923
LGALS3BP-234087-ES	-2.5939	0.3149	0.13152	0.753974	0.00948947
CENPM-62467-AP	2.59386	13.1679	1.87755	92.3504	0.00949041
FEZ2-53198-ES	2.59384	11.6198	1.82101	74.1453	0.00949093
H3F3A-10007-AP	-2.59364	0.425904	0.223455	0.811772	0.00949663
RTN4-53584-AP	2.59351	2.40366	1.23891	4.66343	0.00950006
GSTM2-4063-AD	-2.5935	0.137123	0.0305498	0.61548	0.00950033
NPIPA5-34145-AT	-2.59342	0.0901491	0.0146278	0.555576	0.00950259
DTNB-52862-ES	-2.59025	0.241451	0.0823826	0.707659	0.00959065
NTPCR-10317-AT	-2.5896	0.126483	0.0264483	0.60488	0.00960884
ZNF532-45683-AP	2.58868	2.08555	1.19545	3.63841	0.00963432
PLAC8-69771-AP	-2.5884	0.55192	0.351902	0.865625	0.0096422
MCAM-19135-AP	2.58692	2.86297	1.29036	6.35215	0.00968388
PLBD1-20552-ES	-2.58564	0.0130112	0.000484099	0.349706	0.00971998
MICAL3-61012-AT	2.58542	5.49798	1.51031	20.0142	0.00972612
RUNX2-76401-AT	-2.58523	0.19715	0.0575646	0.675211	0.00973147
SIGIRR-13655-AD	2.58415	3.61581	1.36406	9.58474	0.00976183
TPRA1-66607-AP	2.5841	2.10228	1.19657	3.69353	0.00976327
GNPDA1-73860-ES	-2.58394	0.0226627	0.0012817	0.400715	0.00976779
MPI-31778-ES	-2.58374	0.000569309	1.96801e-06	0.16469	0.00977367
DBNDD1-38196-AP	-2.58318	0.444664	0.240424	0.822403	0.0097895
NCOA3-59723-AD	2.58276	4.03186	1.39962	11.6146	0.00980133
CBX5-22140-AP	-2.58179	0.256603	0.0913699	0.720643	0.00982891
IDNK-86684-AP	2.58131	4.17269	1.41039	12.345	0.00984264
SMG7-9181-AA	2.58105	4.77194	1.45652	15.6341	0.0098501
RASGRP2-16667-AT	2.58087	2.11423	1.19736	3.7332	0.0098552
ASH2L-83368-AP	-2.57904	0.203431	0.0606516	0.682324	0.00990741
PPAPDC1A-13282-AT	-2.57902	0.0103738	0.000322195	0.334007	0.00990815
COQ3-77054-ES	2.57832	103.582	3.04316	3525.66	0.00992813
PYHIN1-8390-AT	-2.57755	0.493139	0.288074	0.844179	0.00995032
TLE3-31411-AD	-2.57751	0.180717	0.0492057	0.66372	0.00995154
EBPL-25900-AT	-2.57744	0.0422138	0.0038037	0.468492	0.00995363
SLC26A1-68437-AT	-2.57697	0.582862	0.3866	0.878758	0.00996708
EYA2-59706-ES	-2.57452	0.000628121	2.29306e-06	0.172057	0.010038
EFEMP1-53634-AP	2.5742	2.43921	1.23709	4.80945	0.0100473
MCAM-19134-AP	-2.57325	0.348021	0.155761	0.777589	0.0100748
CAST-72850-AT	-2.57283	0.0024307	2.47855e-05	0.238376	0.0100871
UBA1-88909-AP	2.57251	3.05219	1.30434	7.1422	0.0100965
ZNF195-13966-ES	2.5722	2.18951	1.20506	3.97818	0.0101053
IDNK-86685-AP	-2.57198	0.250778	0.0874019	0.719543	0.0101117
HAUS1-45382-ES	-2.57188	0.00510269	9.1406e-05	0.284855	0.0101147
CYTH2-50769-AA	-2.57133	0.143075	0.0325016	0.629832	0.0101309
PRPF38B-3947-ES	-2.57099	0.189502	0.0533226	0.673469	0.0101409
CXADR-60227-AT	2.57061	3.54432	1.35064	9.3009	0.010152
BRD9-71461-ES	2.57012	7.7713	1.62707	37.1176	0.0101663
TMLHE-90682-AT	2.56938	3.66384	1.36068	9.86544	0.0101881
ZCCHC9-72670-AD	2.56933	5.66337	1.50871	21.259	0.0101896
NCF2-9186-AP	-2.56895	0.197955	0.0575286	0.681157	0.0102008
SH3YL1-52494-AP	2.56893	5.60295	1.50457	20.8651	0.0102013
PDCD2-78501-RI	-2.5685	0.352495	0.159073	0.781106	0.0102139
HTRA2-54103-ES	2.56826	73.429	2.76652	1948.95	0.010221
NME4-32879-ES	-2.56795	0.395469	0.19481	0.80281	0.0102303
TTLL3-63199-AP	-2.56787	0.0798231	0.0115921	0.549662	0.0102326
VAC14-37412-AP	2.56695	6.97022	1.58269	30.6971	0.0102597
PAK4-49765-ES	-2.56588	0.19691	0.0569101	0.681313	0.0102915
MTIF2-53607-ES	-2.56517	0.359948	0.164884	0.785782	0.0103124
TMEM150A-54297-AP	2.56496	2.34328	1.22245	4.49178	0.0103188
SCHIP1-67468-ES	-2.56438	0.46801	0.261957	0.836142	0.010336
SH3GLB1-3686-ES	-2.56403	0.00216641	1.99139e-05	0.235681	0.0103466
NDUFA7-47216-AT	2.56288	4.35617	1.41368	13.4233	0.0103807
AXIN1-32866-ES	2.56227	2.95372	1.28994	6.76348	0.0103991
NCAM1-18768-AT	-2.56208	0.123373	0.0248894	0.611541	0.0104046
KRTCAP3-95448-ES	-2.56181	0.233439	0.0766977	0.710503	0.0104129
FDFT1-82641-AP	2.56144	4.02962	1.38716	11.7058	0.0104239
DDX55-25084-AP	-2.56096	0.280505	0.106032	0.742069	0.0104383
CDK10-38109-AP	-2.56065	0.143986	0.0326651	0.634681	0.0104476
CLNK-68789-AT	-2.56031	0.375454	0.177367	0.79477	0.0104579
SSFA2-56443-AD	-2.56012	0.0751685	0.0103647	0.545149	0.0104636
ZNF706-84738-AT	-2.55872	0.0608348	0.00712557	0.51938	0.0105059
STRAP-20589-ES	2.55736	208.109	3.47975	12446.2	0.0105471
EEF1D-85444-ES	-2.55734	0.0157007	0.000650518	0.37895	0.0105477
ADD1-68610-AD	-2.55592	0.0697615	0.00905444	0.53749	0.0105908
CDK7-72327-ES	-2.55561	0.014212	0.000544351	0.371047	0.0106
RRM2B-84772-ES	-2.55521	0.102187	0.0177648	0.587806	0.0106123
B4GALT2-2514-AP	-2.55501	0.58727	0.390401	0.883413	0.0106185
ARHGEF1-50102-ES	-2.55441	0.000654897	2.36193e-06	0.181585	0.0106368
CDK16-88911-AP	-2.55365	0.424272	0.219713	0.819282	0.0106601
ZNF207-40205-ES	-2.55164	0.400296	0.198136	0.808722	0.0107216
MIEF1-62308-RI	-2.55007	1.05923e-05	1.5894e-09	0.0705908	0.0107702
PKMYT1-33326-AP	-2.54901	0.417077	0.21291	0.817028	0.010803
ADSSL1-29550-AP	2.54777	2.25314	1.20613	4.20903	0.0108415
GAS2L1-61590-AA	-2.5471	0.0240151	0.00136234	0.423336	0.0108624
TDRKH-7663-RI	-2.54695	0.427759	0.222533	0.82225	0.0108669
TEAD4-19741-AP	2.54658	2.13009	1.19028	3.81195	0.0108784
HNRNPD-69700-ES	2.54648	15.3097	1.87467	125.028	0.0108817
TLCD1-39968-AP	2.54643	3.87809	1.36636	11.0071	0.010883
TRADD-36927-AP	-2.54627	0.262533	0.0937789	0.734956	0.0108882
DDX17-62238-AP	2.5453	2.04708	1.1791	3.554	0.0109183
HNRNPLL-53259-AT	2.54382	4.63619	1.42199	15.1157	0.0109649
ACOT7-390-AP	-2.54333	0.112427	0.0208663	0.605755	0.0109801
GBP3-3709-AD	-2.54333	0.456247	0.249212	0.835278	0.0109803
EHD3-53139-ES	-2.54325	0.120086	0.0234476	0.615012	0.0109826
CTSL-86778-AD	2.54175	4.17008	1.38658	12.5413	0.0110299
LIMS2-55234-ES	-2.54013	0.078733	0.0110772	0.559606	0.0110811
CAPRIN1-14941-AP	2.5397	2.30193	1.20964	4.38057	0.0110947
LINS-32735-AD	-2.5395	0.0186307	0.000861405	0.402951	0.0111011
DNPEP-57689-AD	2.53882	7.41813	1.57917	34.8466	0.0111227
CXCL12-11343-AT	-2.53865	0.579373	0.380146	0.883011	0.0111281
GJB3-1705-AP	-2.53824	0.414822	0.210273	0.818349	0.0111411
FLOT2-40007-ES	-2.53808	0.0427486	0.00374702	0.487705	0.0111464
OBSCN-10203-ES	-2.53801	0.299481	0.118032	0.759872	0.0111485
UBAP1-86144-AP	-2.53724	0.014808	0.000571796	0.383487	0.0111731
TXNDC15-73437-AD	-2.53612	7.66903e-05	5.06268e-08	0.116172	0.011209
TROVE2-9250-AP	2.53582	2.26687	1.20424	4.26718	0.0112183
TMLHE-90681-AT	-2.53571	0.286086	0.108742	0.752652	0.0112219
MS4A6A-16064-ES	-2.53518	0.00442125	6.68809e-05	0.292272	0.0112389
CLN6-31361-ES	-2.53511	1.16231e-05	1.77904e-09	0.0759376	0.0112412
GANC-30142-AT	2.53484	3.71253	1.34646	10.2363	0.01125
IRF7-13714-ES	-2.53473	0.256599	0.0896322	0.734591	0.0112535
FKBP9-79205-ES	-2.53368	0.000293288	5.42654e-07	0.158513	0.0112871
SSX2IP-3625-ES	-2.53331	0.259939	0.091658	0.737179	0.0112992
LRP11-78120-AP	2.53268	1.80592	1.143	2.85331	0.0113194
RRN3-34141-ES	-2.53252	0.207156	0.0612586	0.700531	0.0113246
SEC16A-88173-ES	2.53248	2.48979	1.22903	5.04388	0.0113257
USP8-30593-ES	-2.53198	0.0611547	0.00703112	0.531907	0.0113421
TRABD-62789-AP	-2.5313	0.344826	0.151205	0.786381	0.0113642
ORC4-55522-AP	-2.53082	0.348471	0.154029	0.78837	0.0113796
CXADR-60226-AT	-2.52942	0.295325	0.114776	0.759885	0.0114252
NCAM1-18767-AT	2.52906	7.65316	1.58083	37.0507	0.0114367
SPNS1-35907-RI	-2.52879	0.00659466	0.000134566	0.323184	0.0114457
MAX-27938-RI	-2.52874	0.428768	0.222417	0.826566	0.0114473
SUPT4H1-42661-AP	-2.52847	0.324294	0.135469	0.776315	0.011456
SLC25A1-61041-AP	-2.52779	0.286576	0.108743	0.755229	0.0114784
BEAN1-36710-AT	2.52715	1.8236	1.14436	2.906	0.0114991
WAC-11098-AP	2.52483	3.63462	1.33472	9.89757	0.0115753
GAS2L1-61596-RI	-2.52474	0.502228	0.294245	0.857221	0.0115785
PCM1-82834-AT	-2.52403	0.0064857	0.000129687	0.324353	0.0116017
SYNJ2-78248-ES	-2.52337	0.0444246	0.00395549	0.498938	0.0116235
BTN2A1-75671-ES	-2.52334	0.512784	0.305233	0.861466	0.0116245
CELF1-15758-AP	-2.52322	0.098496	0.0162756	0.596076	0.0116285
EP400-25233-ES	2.52257	4.2846	1.38336	13.2705	0.0116499
MIA3-9887-AP	2.52253	3.06761	1.284	7.32883	0.0116513
POM121-79926-AP	-2.52186	0.319108	0.131342	0.775305	0.0116737
PAK4-49763-ES	-2.52121	0.0455971	0.00413438	0.502881	0.0116951
TATDN3-9751-AT	-2.52016	0.00432452	6.27149e-05	0.298199	0.0117303
ARL2-16726-RI	-2.52004	0.000393795	8.85593e-07	0.175108	0.0117343
SH3BP1-62136-RI	-2.51983	0.000175687	2.10781e-07	0.146435	0.0117413
RBM42-49228-AA	2.51977	14.0659	1.79921	109.964	0.0117432
LRFN4-17140-AP	-2.51887	0.151007	0.034687	0.6574	0.0117732
GNB2L1-190579-ES	2.51777	2.46085	1.2208	4.96052	0.01181
IRF7-13710-ES	-2.51758	0.405459	0.200784	0.818775	0.0118164
SMARCA4-47612-ES	-2.51755	0.0564027	0.006014	0.528977	0.0118173
FES-32501-ES	-2.51723	0.218533	0.0668734	0.714137	0.0118281
ZNF346-74698-AT	-2.51687	0.117885	0.0223037	0.623079	0.0118403
ZNF467-82205-AA	2.51683	2.47821	1.22238	5.02426	0.0118417
MAGI3-4271-AT	-2.51549	0.011909	0.000377289	0.375902	0.0118869
CHCHD3-81834-AT	2.51547	4.69921	1.40736	15.6907	0.0118875
UBE2C-95967-ES	-2.51547	0.349577	0.15413	0.792863	0.0118875
CHEK1-19309-AP	2.51536	2.21705	1.1922	4.1229	0.011891
ANO8-48279-AA	2.51459	1.85379	1.14584	2.99913	0.0119171
SEC31A-69735-AD	-2.51356	0.380682	0.179268	0.80839	0.0119519
RBMS1-55728-ES	2.51247	4.02246	1.3581	11.9138	0.011989
ZNF692-10547-AP	-2.51242	0.581475	0.380925	0.887612	0.0119908
GRB7-40693-AP	2.51202	2.98694	1.27186	7.01481	0.0120044
MPHOSPH8-25401-AT	2.51108	5.13608	1.43207	18.4204	0.0120364
NFYC-2019-AA	-2.51055	0.154103	0.0357883	0.663557	0.0120542
EML3-16360-AP	-2.50884	0.498435	0.289317	0.858704	0.0121127
TRMT44-68768-AP	2.50789	3.71237	1.33186	10.3477	0.0121455
EVL-29241-AP	-2.50776	0.638657	0.449855	0.906697	0.0121498
GALNT4-23641-AP	-2.50744	0.320806	0.131915	0.780175	0.0121608
ARL6IP4-25029-AD	2.50651	6.2943	1.49352	26.5268	0.012193
CFLAR-56783-AP	2.50647	2.62783	1.23449	5.59381	0.0121944
CDKN3-27577-ES	-2.50566	0.000762309	2.77518e-06	0.209397	0.0122222
OS9-22706-ES	-2.50558	0.00644114	0.000124465	0.333333	0.0122251
SOD2-78303-AT	-2.50538	0.392878	0.189166	0.815964	0.012232
B3GALNT1-67494-AP	2.50487	1.9999	1.16273	3.43981	0.0122498
IGFBP3-79600-RI	2.50464	2.59482	1.23042	5.47219	0.0122577
IL17RE-63246-ES	2.50461	7.28565	1.5401	34.4657	0.0122588
TTLL11-87448-AT	-2.50448	0.555751	0.350936	0.880101	0.0122631
FCGR2B-8681-ES	-2.50402	0.352974	0.156224	0.79751	0.012279
HMGA1-75773-RI	-2.50389	0.457035	0.24761	0.843587	0.0122836
RAB3D-47652-AP	2.50376	2.6915	1.23991	5.84249	0.012288
TRMT44-68769-AP	-2.50236	0.25947	0.0901934	0.74645	0.0123368
GOLGA6L4-32284-RI	-2.50231	0.0208499	0.00100582	0.432202	0.0123387
ZNF76-75900-RI	2.50189	7.103	1.52907	32.9956	0.0123533
GJB3-1704-AP	2.50169	2.35967	1.20431	4.62343	0.0123603
TMEM63A-10001-AT	-2.50034	0.0902226	0.0136901	0.594598	0.0124076
POLR2F-62180-AT	-2.50017	0.379449	0.177516	0.81109	0.0124135
DMTN-82928-ES	2.49916	3.22041	1.28701	8.05825	0.0124487
ZNF589-64569-AT	2.49916	2.60749	1.2297	5.52899	0.0124489
NAA30-27654-ES	-2.49859	0.000981885	4.29093e-06	0.224683	0.0124687
SIPA1-16889-AP	-2.49821	0.274926	0.0998284	0.757144	0.0124824
RNF166-38013-AP	-2.4981	0.417284	0.210198	0.828389	0.0124862
RNF170-83747-AD	2.49809	5.02544	1.41594	17.8363	0.0124864
TBRG1-19226-ES	-2.49769	0.457313	0.247502	0.844982	0.0125005
IFITM2-13641-AP	-2.49733	0.0844562	0.0121402	0.58754	0.0125134
NAT14-52109-RI	-2.49717	0.213756	0.0636782	0.717542	0.0125188
MTFR1L-1209-AA	-2.49655	0.061737	0.00693492	0.549604	0.0125407
ZNF680-79826-AT	-2.49625	0.0868924	0.0127617	0.591637	0.0125515
OXLD1-44143-AD	-2.49607	0.431711	0.223223	0.834925	0.012558
CEACAM5-50088-AA	-2.49569	0.0136876	0.000470662	0.398055	0.0125712
BAD-16613-ES	-2.49486	0.170199	0.0423447	0.684096	0.0126005
DDX55-25083-AP	2.49463	3.25319	1.28766	8.21896	0.0126087
CPSF6-23304-ES	2.49415	8.19858	1.56928	42.8328	0.0126258
STK32C-13485-AP	2.49404	4.18446	1.35868	12.8872	0.0126298
CHCHD3-81833-AT	-2.49361	0.219546	0.0666755	0.722909	0.0126453
MKNK1-2806-AT	-2.49172	0.0381277	0.00291915	0.497995	0.0127127
C6orf211-78159-ES	-2.49129	0.0651127	0.00759182	0.558451	0.0127279
MYO1E-30933-ES	-2.49129	0.00012628	1.0818e-07	0.147407	0.012728
ATP6V0A2-25112-AP	2.49047	2.12767	1.17449	3.85443	0.0127574
BCL2L13-60988-ES	-2.49035	0.0318844	0.00211769	0.48006	0.0127616
POM121-79925-AP	2.48991	3.10899	1.27306	7.59262	0.0127775
FAM219B-31802-ES	2.48941	6.30663	1.47945	26.884	0.0127954
SLC1A4-53775-AP	-2.4893	0.131222	0.0265196	0.649304	0.0127993
TTLL11-87447-AT	2.48918	1.78466	1.13105	2.81597	0.0128039
TRIOBP-62150-AP	-2.48915	0.0858034	0.0124091	0.59329	0.012805
FDFT1-82638-AP	-2.48894	0.240547	0.0783276	0.738731	0.0128125
FYN-77273-ME	2.48891	1.74958	1.12623	2.71793	0.0128134
RPS7-52575-AD	-2.48838	0.135292	0.0279912	0.653916	0.0128326
RMND5B-74837-AA	-2.48838	0.00969681	0.000251653	0.373643	0.0128328
RTN4-53582-AP	-2.4881	0.411206	0.204193	0.828091	0.0128427
PRR13-22033-AA	-2.48637	0.0188884	0.000826704	0.431558	0.0129052
HECTD3-2592-RI	-2.48612	0.0244614	0.00131226	0.455976	0.0129144
ZNF7-85658-AT	-2.48544	0.0917581	0.0139511	0.603503	0.012939
TOP2B-63747-AP	-2.48539	0.164567	0.0396603	0.682858	0.012941
SERPINH1-17866-AP	2.4852	179.781	2.99593	10788.4	0.0129478
GIT2-24387-ES	-2.48466	0.292862	0.111161	0.771566	0.0129676
REEP5-72994-ES	-2.48438	0.01227	0.000381155	0.39499	0.0129779
AAED1-86980-ES	2.48434	4.75255	1.38957	16.2545	0.0129792
NUP54-69584-ES	-2.48416	0.00768272	0.000164899	0.357942	0.0129858
ST7-81565-ES	-2.48329	0.0116415	0.000346405	0.391228	0.0130174
GADD45B-46611-AD	-2.4823	0.000553318	1.48355e-06	0.20637	0.0130539
NNT-71963-AP	-2.48149	0.399285	0.193358	0.824524	0.0130835
DBP-50797-AT	-2.48012	0.00177685	1.19162e-05	0.264951	0.0131337
NIPA2-29682-ES	-2.47991	0.323158	0.132339	0.789118	0.0131415
CAPN1-16799-AP	-2.47954	0.0831097	0.0116328	0.593769	0.0131551
MRPL23-13894-AT	2.47864	3.62692	1.30945	10.0459	0.0131886
IKBKB-83692-ES	-2.47842	0.23331	0.073805	0.737529	0.0131966
HSBP1L1-46269-ES	-2.47817	0.297852	0.114286	0.776263	0.0132058
HPS5-14595-ES	-2.47802	0.475448	0.264065	0.856042	0.0132114
RAB3D-47651-AP	-2.47783	0.384454	0.180492	0.818902	0.0132183
TMEM199-39890-AT	-2.47774	0.0203133	0.000931512	0.442968	0.0132216
NR3C1-73878-AP	-2.47766	0.186591	0.0494455	0.704135	0.0132247
TUBB3-38166-AP	-2.47735	0.171282	0.042409	0.691773	0.0132362
ZCCHC17-1465-ES	-2.47683	0.00749989	0.000156151	0.360217	0.0132554
PAFAH1B3-50147-RI	-2.47653	0.156787	0.0361799	0.679444	0.0132666
TICAM2-73030-AP	2.47599	7.90934	1.5388	40.6534	0.0132867
CHEK1-19307-AP	-2.4757	0.461438	0.250149	0.851194	0.0132976
ALDH3B1-17274-ES	-2.47556	0.28653	0.106512	0.770801	0.0133028
NGEF-58034-AT	-2.47556	0.00124974	6.28485e-06	0.24851	0.0133028
RPL6-24584-AD	2.47551	2.76873	1.23626	6.20088	0.0133047
PAK4-49764-ES	-2.47471	0.284231	0.10495	0.769772	0.0133343
UROS-13429-AT	-2.47455	0.00439823	5.97916e-05	0.32353	0.0133403
FBLIM1-773-AT	-2.47232	0.109939	0.0190992	0.632836	0.0134239
EML3-16359-AP	2.47215	1.94755	1.14809	3.30369	0.0134302
ARPP19-30693-AD	2.47113	10.671	1.63188	69.779	0.0134688
TEX30-26216-ES	2.46982	9.74435	1.59997	59.3463	0.0135181
ODF2-87755-AT	-2.46936	0.0781641	0.0103365	0.591076	0.0135356
RIC8B-24157-AP	2.46906	2.07891	1.16288	3.71654	0.0135469
ZNF208-48799-AT	-2.46734	0.557552	0.350545	0.886803	0.0136122
TYROBP-49314-AA	-2.46674	0.0519805	0.00496025	0.544724	0.0136348
ELP5-38889-RI	-2.4663	0.191281	0.0513828	0.712075	0.0136517
POM121C-80118-AP	2.46565	3.54186	1.29612	9.67874	0.0136763
SERPINA1-29136-ES	2.4639	2.18875	1.17376	4.08143	0.0137435
SLC39A13-15739-RI	-2.46387	0.089775	0.013195	0.610802	0.0137445
PPAN-47458-AP	-2.46328	0.222734	0.0674277	0.735758	0.0137673
FAM86B1-82680-AT	-2.46256	0.012339	0.000373351	0.407795	0.013795
ECHDC1-77467-ES	-2.46244	0.290427	0.108553	0.777016	0.0137996
B9D2-50061-ES	2.46231	19.6342	1.83567	210.005	0.0138044
NPIPA8-34240-ES	2.46226	2.58548	1.21383	5.50713	0.0138066
TM9SF1-26892-AP	2.46223	3.31651	1.27707	8.61291	0.0138075
PPM1K-69887-ES	-2.46222	0.438521	0.227515	0.845222	0.0138078
TRAF4-39978-AA	-2.46158	0.00930289	0.000224484	0.385524	0.0138328
CENPI-89632-ES	-2.46151	0.14346	0.0305691	0.673253	0.0138352
CDH23-12058-AT	2.46134	1.83679	1.13185	2.98078	0.013842
ZGPAT-60164-AD	2.46098	4.93632	1.38409	17.6052	0.0138559
CCDC58-66432-AD	2.46089	77.2704	2.42277	2464.42	0.0138595
SCNM1-7565-AD	2.46048	6.44877	1.46105	28.4636	0.0138753
C18orf32-45475-AD	2.46043	3.04536	1.25422	7.39439	0.0138771
TM9SF1-26891-AP	-2.46036	0.30887	0.121149	0.787462	0.01388
TRIM7-75044-AP	-2.45983	0.46777	0.25534	0.856932	0.0139001
WIPF1-56031-AT	2.45983	17.7383	1.79389	175.399	0.0139002
GOLM1-86743-AP	2.45967	2.16915	1.17036	4.02031	0.0139066
SAT1-88697-AT	2.45956	11.9069	1.65395	85.7188	0.0139106
EFNA3-7938-ES	2.45897	8.90507	1.55852	50.8817	0.0139335
PARPBP-24046-ES	-2.45741	0.471951	0.259302	0.85899	0.0139943
SGCB-69277-ES	-2.45707	0.110673	0.0191201	0.64061	0.0140075
WRAP53-39043-AP	2.45681	2.75166	1.22716	6.17004	0.0140175
SLC22A23-75197-ES	2.45675	3.37176	1.27861	8.89147	0.01402
TICAM2-73029-AP	-2.45552	0.125755	0.0240314	0.658072	0.0140682
FBXL22-31066-AT	2.45551	2.23812	1.17655	4.25752	0.0140686
ODF2-87754-AT	2.45545	14.1191	1.70616	116.841	0.0140709
TPM1-30981-AP	-2.45508	0.201621	0.0561473	0.724011	0.0140852
UBL4A-90617-ES	-2.45508	0.000394616	7.56484e-07	0.205849	0.0140853
RNF44-74655-AP	2.45485	2.52174	1.20498	5.27739	0.0140943
ZKSCAN1-80868-ES	-2.45472	0.000909265	3.39131e-06	0.243789	0.0140994
TMEM41B-14310-AT	-2.45414	0.000702767	2.1309e-06	0.231772	0.0141222
TBC1D1-69014-AT	-2.45388	0.116919	0.0210564	0.649211	0.0141326
SMN1-72421-RI	-2.45345	0.150811	0.0332747	0.683517	0.0141492
TSC22D3-89837-AP	2.45334	4.57179	1.35752	15.3967	0.0141537
UPB1-61403-AT	2.45314	1.50313	1.08538	2.08166	0.0141615
PTGDS-88237-AT	-2.4531	0.049643	0.00450695	0.546806	0.014163
PAM-72893-ES	2.45259	48.2863	2.17878	1070.13	0.0141831
WSB2-24688-AP	2.4516	4.39153	1.34545	14.3338	0.0142222
LRP11-78119-AP	-2.45153	0.545656	0.336193	0.885623	0.0142251
PPAN-47459-AP	2.45135	4.64705	1.36063	15.8714	0.0142321
COL1A1-316104-ES	-2.45083	0.283224	0.103274	0.77673	0.0142528
FAM115A-82127-AD	2.45059	2.79144	1.22817	6.34452	0.0142622
PCYOX1-53877-AP	2.44985	2.25843	1.17693	4.33375	0.0142915
RANBP1-61136-AP	-2.44841	0.302235	0.115974	0.787645	0.0143486
RHOT1-40175-AT	-2.44795	0.0288229	0.00168469	0.493123	0.0143671
FLT3LG-50943-AT	2.44769	5.71917	1.41548	23.1079	0.0143777
GNAI2-64968-AP	-2.44766	0.202842	0.0565412	0.727696	0.0143785
PLEKHM1-41970-AP	-2.44766	0.123022	0.0229768	0.658685	0.0143786
UBXN11-101233-ES	2.4476	2.24495	1.17482	4.28985	0.0143811
IVNS1ABP-9218-ES	-2.44669	0.329387	0.135318	0.801781	0.0144174
EIF4E2-58001-ES	2.44661	2.19775	1.16956	4.12986	0.0144208
DHRS4L2-26804-ES	-2.44577	0.306397	0.118743	0.790606	0.0144543
C11orf30-17890-AT	2.44554	8.93056	1.54455	51.6364	0.0144637
COCH-27088-AT	-2.44525	0.383842	0.17817	0.826935	0.0144754
RIC8B-24156-AP	-2.44449	0.488958	0.275507	0.867781	0.0145057
TMEM59-3111-AP	2.44337	3.19413	1.2583	8.10816	0.0145508
UPB1-61404-AT	-2.44306	0.669395	0.485103	0.923698	0.0145635
MAF1-85534-RI	-2.44261	0.0311996	0.00193128	0.504026	0.0145815
ZNF550-52292-AT	-2.44218	0.0667316	0.00759978	0.585953	0.0145991
CLCF1-17173-AP	-2.44103	0.405038	0.19604	0.83685	0.0146455
TP53-39037-AT	-2.43951	0.0241082	0.00120881	0.480811	0.0147072
PCYOX1-53879-AP	-2.43879	0.447124	0.234147	0.853819	0.0147366
NRG1-83314-AT	2.43813	2.74612	1.2191	6.18582	0.0147636
TBC1D9B-74988-AP	-2.43797	0.319266	0.127504	0.79943	0.01477
PLEKHM3-57205-AT	2.43725	2.13109	1.15971	3.9161	0.0147996
COCH-27090-AT	2.43699	2.60618	1.20623	5.63089	0.01481
KIAA1731-18305-AA	-2.4354	0.28247	0.102124	0.781303	0.0148753
MMS19-12716-ES	2.43508	93.1454	2.4222	3581.89	0.0148884
MAGED2-89247-AP	2.43427	2.53858	1.19904	5.37463	0.014922
TSKU-17902-AP	-2.43373	0.514835	0.301623	0.878762	0.0149441
REEP5-72992-ES	-2.43358	0.167849	0.0398731	0.70657	0.0149503
TNPO2-47848-AP	-2.43322	0.368613	0.164984	0.823568	0.0149654
PKMYT1-33325-AP	2.43292	2.18771	1.16438	4.11041	0.0149775
CD3D-18990-ES	-2.43156	0.000205118	2.1842e-07	0.192627	0.0150338
LSMD1-39058-AP	2.43053	2.9477	1.23281	7.04809	0.0150766
ZNF134-52307-AT	-2.43038	0.0148002	0.000495098	0.442432	0.0150832
CACNA2D1-80254-AT	-2.4303	0.0709734	0.00840501	0.599312	0.0150864
P4HA2-73261-ES	2.43012	2.10036	1.1544	3.82148	0.0150937
UBXN11-1251-ES	-2.42881	0.0760245	0.00950437	0.608112	0.0151484
NEO1-31598-ES	2.42865	9.7886	1.55307	61.6951	0.0151552
SLC25A39-41837-AA	-2.42826	0.226589	0.0683632	0.751029	0.0151715
PNISR-77055-RI	2.42753	2.63676	1.20532	5.76819	0.0152022
COL18A1-60875-AP	-2.42701	0.672678	0.488371	0.92654	0.015224
ENO3-38619-AT	2.42682	2.78844	1.21808	6.38334	0.0152318
SLC25A1-61042-AP	2.42664	3.22671	1.25268	8.31146	0.0152393
PHYH-10789-AP	2.42649	32.2845	1.9504	534.398	0.0152458
UCK1-87959-ES	-2.42513	0.000910354	3.17453e-06	0.261061	0.0153028
VEZT-23763-ES	2.42507	10.83	1.57918	74.2713	0.0153053
TMEM107-39133-ES	2.42478	2.96205	1.23141	7.12497	0.0153175
PRKAB1-24704-AP	-2.42458	0.414457	0.203357	0.844692	0.0153261
NFKB2-12948-AA	-2.42442	0.159207	0.0360418	0.703261	0.0153329
TECR-564146-ES	-2.42401	0.48858	0.273792	0.871868	0.0153501
CEP70-67006-ES	2.42319	9.64543	1.54229	60.3223	0.015385
SIPA1L1-28198-AA	-2.42256	0.164246	0.0380884	0.708265	0.0154116
SOD2-78301-AT	2.42221	2.46387	1.18778	5.11093	0.0154263
TSKU-17903-AP	2.4215	1.91809	1.13218	3.24955	0.0154566
ANXA8L2-11458-ES	-2.42145	0.00376147	4.10023e-05	0.34507	0.0154588
ZNF780A-49865-RI	-2.42111	1.81106e-05	2.62475e-09	0.124962	0.015473
MARCH8-11362-ES	2.42048	1.88876	1.12861	3.16088	0.0155001
GALNT4-23640-AP	2.42027	3.09147	1.23944	7.7109	0.0155088
ANKRD54-62163-AP	-2.41998	0.507755	0.293265	0.879119	0.0155214
C1orf43-7808-ES	2.41924	4.75663	1.34456	16.8274	0.0155529
TRIQK-84507-ES	-2.41805	0.213365	0.0610017	0.746286	0.0156037
COL18A1-60874-AP	2.41784	1.47923	1.07696	2.03176	0.0156131
NPRL2-65041-AA	-2.41776	0.470834	0.255669	0.867078	0.0156162
SYMPK-50530-AP	-2.41752	0.422899	0.210482	0.849687	0.0156267
TMC6-43751-AP	-2.41734	0.0453571	0.00369372	0.556963	0.0156342
AFMID-43817-ES	2.41722	1.78251	1.11554	2.84824	0.0156396
EFEMP1-53633-AP	-2.41706	0.41878	0.206756	0.848229	0.0156465
GRN-522184-ES	2.41671	3.12949	1.24063	7.89416	0.0156617
TMEM62-30209-AP	2.41663	2.22705	1.16335	4.26336	0.0156651
TP63-68093-AP	-2.4164	0.11457	0.0197642	0.66415	0.0156746
ZNF346-74699-AT	2.41593	7.82907	1.47459	41.567	0.0156952
ZNF12-78758-AP	-2.41585	0.376376	0.170344	0.831604	0.0156984
MED6-28183-AT	2.41568	16.5434	1.69783	161.197	0.0157057
PRSS27-33297-ES	-2.41544	0.340013	0.141689	0.815933	0.0157161
FAM105B-71590-ES	-2.4144	0.197615	0.0529881	0.736989	0.0157613
CCDC14-66492-AD	2.414	1.59205	1.0914	2.32234	0.0157784
TANK-55743-ES	-2.41385	0.391069	0.182464	0.838167	0.0157852
NUDT4-23680-AA	-2.41371	0.275845	0.0969341	0.784968	0.015791
CCNL2-90737-AD	-2.41349	0.280904	0.10017	0.787727	0.0158003
PGM2-69004-AT	-2.41291	0.0155576	0.000528792	0.457718	0.0158259
RAP1GDS1-69997-ES	-2.41289	0.00105559	4.0338e-06	0.276232	0.0158265
CHKA-17289-ES	-2.41171	0.13965	0.0281986	0.691599	0.0158779
WIBG-22287-AP	2.41074	3.73648	1.27951	10.9114	0.0159201
APH1A-7444-RI	-2.41002	0.177096	0.0433321	0.72378	0.0159514
MPRIP-39457-ES	2.40982	1.98387	1.13642	3.46327	0.0159604
PAPOLG-53670-AD	2.40962	6.11699	1.40209	26.687	0.015969
SMEK1-28882-RI	2.40883	2.91798	1.22085	6.97431	0.0160039
SELPLG-24247-RI	-2.40874	0.545447	0.333081	0.893212	0.0160079
TEAD4-19740-AP	-2.40767	0.484958	0.269061	0.87409	0.0160545
ATP2A3-38502-RI	-2.40711	0.0161312	0.000560119	0.464572	0.0160791
MEGF8-50158-ES	-2.40672	0.397224	0.187285	0.842498	0.0160964
ATG4D-47539-ES	2.40531	2.55249	1.18946	5.47746	0.0161589
MAP3K8-11121-AP	-2.40519	0.546521	0.33403	0.894187	0.0161641
CCDC126-78980-AP	-2.40512	5.18663e-14	7.73876e-25	0.00347616	0.0161671
C16orf62-34321-AT	-2.40512	5.18663e-14	7.73876e-25	0.00347616	0.0161671
CEP76-44709-ES	-2.40512	5.18663e-14	7.73876e-25	0.00347616	0.0161671
THTPA-26757-AD	-2.40467	0.135398	0.0265353	0.690882	0.0161869
PCED1A-58556-AP	-2.40438	0.332346	0.135396	0.81578	0.0162
BTF3L4-2993-AT	-2.4042	0.000207295	2.0596e-07	0.208638	0.0162077
IRF3-51002-AD	2.4041	7.63878	1.45589	40.0792	0.0162125
PCED1A-58557-AP	2.40384	3.02727	1.22695	7.46921	0.0162239
ADHFE1-84001-AT	-2.40383	5.26033e-14	7.83434e-25	0.00353202	0.0162241
LRRC20-12050-ES	-2.40338	0.315163	0.12291	0.808132	0.0162445
CAMLG-73422-ES	2.40277	30.4123	1.87634	492.931	0.0162713
LRRC23-20002-ES	-2.4023	0.293859	0.108196	0.798121	0.0162924
FOXP4-76112-AA	2.40223	3.69369	1.27196	10.7263	0.0162954
NME4-32876-AT	-2.40111	0.124408	0.0226983	0.681868	0.0163455
SULT1A1-35821-ES	-2.40091	0.344203	0.144111	0.822115	0.0163544
AURKA-59873-AD	-2.40056	0.341275	0.141874	0.82093	0.01637
GFOD2-37099-AT	-2.40024	0.106924	0.0172283	0.663596	0.0163845
EML2-50501-ES	-2.40016	0.000189283	1.72589e-07	0.207591	0.0163878
ESRP1-84569-AD	2.39989	2.90873	1.21619	6.95673	0.0164
SENP7-65948-ES	-2.3996	0.392905	0.183192	0.842691	0.016413
TCF3-46532-AP	2.39894	2.05019	1.14039	3.68583	0.0164428
NEK3-25994-ES	2.39859	1.68899	1.10059	2.59197	0.0164582
TOP2B-63746-AP	2.39794	3.63381	1.26575	10.4322	0.0164877
PACRGL-68902-ES	-2.39739	0.213348	0.0603381	0.754373	0.0165124
IFT20-39880-RI	-2.39679	0.0913105	0.0128971	0.64647	0.0165392
CCDC141-56396-AT	2.39648	1.95272	1.12964	3.37552	0.0165535
YIPF3-76299-AA	-2.39624	0.0187	0.000721645	0.484572	0.0165641
FUT10-83325-AT	-2.39624	0.126781	0.0234105	0.686588	0.0165643
EXO5-2002-RI	-2.39576	0.393927	0.183834	0.844122	0.0165861
ZNF12-78757-AP	2.39544	2.63764	1.19282	5.83252	0.0166004
TAF15-40340-ES	-2.39482	0.000862977	2.68145e-06	0.277733	0.0166283
HSPBP1-52051-AP	-2.39464	0.336474	0.137966	0.820601	0.0166366
UEVLD-14672-ES	-2.394	0.0107656	0.000263556	0.43975	0.0166658
TRA2B-68039-ES	-2.39387	0.451246	0.235215	0.865686	0.0166718
BRWD1-60606-RI	-2.39379	0.000869283	2.7104e-06	0.278798	0.0166755
C14orf159-28849-RI	-2.39249	0.442714	0.227103	0.863027	0.0167344
PAK1-17955-ES	-2.39232	0.000260504	3.01571e-07	0.225029	0.0167421
MUTYH-2676-AD	2.39149	2.78469	1.20297	6.4461	0.0167802
CEP57L1-77169-AA	2.39087	6.45493	1.39948	29.7726	0.0168085
CAPN1-16802-AP	2.38965	7.37266	1.43222	37.9524	0.0168642
TBC1D1-69013-AT	2.3895	7.65003	1.44161	40.5955	0.0168711
MIA3-9888-AP	-2.38928	0.346397	0.145171	0.82655	0.0168816
USP39-54316-RI	-2.38892	0.169579	0.0395475	0.727152	0.0168979
FXYD5-49075-RI	-2.38849	0.303025	0.113759	0.80718	0.0169177
TANGO2-61114-AP	2.38676	5.35253	1.34983	21.2246	0.0169976
RUNX2-76402-AT	2.38588	4.20936	1.29251	13.7088	0.0170382
KCTD10-24289-AP	2.38581	2.77557	1.19987	6.4205	0.0170414
TMSB4X-88497-RI	2.38534	4.35794	1.30018	14.6069	0.0170631
LRCH3-68323-RI	-2.38511	0.0199584	0.000800303	0.497732	0.0170739
RERG-20571-AT	-2.38501	0.010309	0.000240162	0.442514	0.0170788
UBA52-48478-AD	2.38463	2.32184	1.16185	4.63997	0.0170962
SYMPK-50529-AP	2.38371	2.27193	1.15706	4.46102	0.017139
CDADC1-25877-ES	-2.38324	0.230305	0.0688441	0.770445	0.017161
ZNF395-83211-AP	2.38313	2.53085	1.17925	5.43159	0.0171661
RNF181-54296-AA	-2.3824	3.87085e-05	9.07731e-09	0.165065	0.0172004
SLC8B1-24634-AP	2.38194	2.1607	1.14624	4.073	0.0172218
MUTYH-2674-AA	-2.38157	0.296802	0.109225	0.806515	0.0172392
DNAJC4-16600-ES	-2.38126	0.151999	0.0322428	0.716554	0.0172534
RPL26L1-74569-AP	-2.38124	0.128245	0.0236529	0.695343	0.0172544
ZNF707-85481-AD	-2.38097	0.411774	0.19836	0.854798	0.0172672
TAMM41-63406-ES	2.38059	38.4957	1.90602	777.493	0.0172849
HAUS3-68549-ES	-2.38012	0.209088	0.0576285	0.758611	0.017307
ENO3-38620-AT	-2.37998	0.369754	0.162959	0.838967	0.0173134
SAR1B-73412-AP	-2.37984	0.373801	0.166219	0.840623	0.0173202
LIMS1-54885-AP	2.37977	1.93267	1.12326	3.32534	0.0173234
ALS2CL-64461-RI	2.37912	2.25672	1.15419	4.41245	0.0173539
UBXN11-1263-ES	2.37908	3.36295	1.2382	9.13378	0.017356
B3GALNT1-67496-AP	-2.37882	0.502593	0.285129	0.885913	0.0173683
C20orf96-58438-AT	-2.3785	0.288144	0.10335	0.803357	0.017383
AKT1S1-51109-AP	2.37839	6.04627	1.37241	26.6374	0.0173886
SLC9A3R1-43285-AP	2.37833	4756.1	4.43464	5.10086e+06	0.0173912
ABTB1-66619-RI	2.37792	10.1202	1.50203	68.1872	0.0174105
NLN-72252-ES	-2.37747	0.536568	0.321166	0.896437	0.017432
RHOJ-27815-AT	-2.37728	0.00264201	1.97894e-05	0.352725	0.0174408
HSD17B11-69862-ES	-2.37717	0.00028519	3.40726e-07	0.238705	0.0174462
SLC7A8-26710-AP	2.3764	1.62803	1.08916	2.43351	0.0174824
RBBP6-35644-ES	2.37587	3.14737	1.22227	8.10455	0.0175077
PRKAB1-24705-AP	2.37532	2.33061	1.15946	4.68471	0.0175338
SPOP-42312-ES	-2.37512	0.460044	0.242403	0.873091	0.0175433
MLF1-67444-AD	2.37499	4.92707	1.32139	18.3716	0.0175493
SYNPO2-70454-AT	2.37471	3.41656	1.23934	9.41862	0.0175627
GIT2-24385-ES	-2.37364	0.357398	0.15282	0.835841	0.0176137
TMEM19-23411-AT	-2.37348	0.00258147	1.88213e-05	0.354067	0.0176213
STAT2-22430-AA	-2.37332	0.178165	0.0428675	0.740489	0.0176292
CRYZ-3467-ES	-2.37232	0.281986	0.0990868	0.802488	0.0176768
HENMT1-3942-AP	2.37221	2.97692	1.20874	7.33165	0.0176819
TMC6-43755-AP	-2.37199	0.392224	0.180997	0.849954	0.0176927
WDR35-52748-ES	-2.37094	0.062451	0.00630751	0.618331	0.017743
PRKAR1A-43141-AP	-2.37073	0.452311	0.234734	0.871563	0.0177528
FMR1-90269-AA	-2.37016	0.0948568	0.0135261	0.665218	0.0177804
NME4-32877-AT	2.36951	7.7125	1.42345	41.7876	0.0178117
RNF7-67080-AD	-2.36946	0.00310452	2.61471e-05	0.368607	0.0178143
ATP2B1-23648-ES	-2.36923	0.00372335	3.64306e-05	0.38054	0.0178253
UGT8-70428-AP	-2.36878	0.0966726	0.0139871	0.668158	0.0178469
HNRNPD-69698-AT	2.36847	5.51944	1.34264	22.6898	0.017862
PSMA2-79318-AT	-2.36842	0.223603	0.064736	0.772345	0.0178642
ARHGAP5-27129-AA	-2.36839	0.268724	0.0905793	0.79723	0.0178655
GOLM1-86745-AP	-2.36785	0.454469	0.236596	0.872975	0.0178917
KCNJ11-14528-AP	-2.36565	0.0180302	0.000647265	0.502251	0.0179984
TC2N-28883-AP	-2.36541	0.318048	0.123101	0.82172	0.01801
C16orf58-36278-RI	-2.36527	0.202013	0.0536769	0.760276	0.0180169
UVRAG-17880-AP	2.36488	1.88953	1.11511	3.20176	0.018036
PDZD11-89371-ES	2.36422	9.9995	1.48247	67.4483	0.0180681
HNRNPF-11324-AP	-2.363	0.054966	0.00495542	0.609688	0.0181276
TPM1-31008-AA	2.36232	1.7378	1.09869	2.74866	0.018161
ALDH3A1-39773-RI	-2.36226	0.46838	0.249629	0.878825	0.0181639
DHFRL1-65704-RI	-2.36198	0.0486547	0.00396011	0.597782	0.0181774
FANK1-13444-ES	2.36183	2.93813	1.20127	7.18622	0.0181851
POM121C-80119-AP	-2.36108	0.315197	0.120878	0.821895	0.018222
TUBGCP2-13529-AP	2.36103	2.5433	1.17183	5.51991	0.0182244
STK32C-13486-AP	-2.36083	0.370956	0.162845	0.845028	0.0182339
XRCC4-72698-AA	-2.36079	0.7424	0.579749	0.950684	0.0182358
TRADD-36928-AP	2.36037	3.18169	1.21694	8.31851	0.0182566
PLA2G4B-30115-AP	2.35961	4.55673	1.29288	16.0602	0.018294
EVA1C-60343-AD	2.35877	5.35626	1.3281	21.6019	0.0183355
C12orf23-24179-ES	-2.3585	0.415462	0.200227	0.862066	0.0183492
RPAIN-38683-ES	2.35834	2.75731	1.18688	6.40567	0.0183571
SIRT3-13601-AA	-2.35819	0.0779127	0.0093409	0.649872	0.0183645
RACGAP1-21636-AD	-2.358	0.405668	0.191638	0.858734	0.0183739
SP140L-57885-AP	2.35758	1.92332	1.11662	3.31282	0.0183947
CFLAR-56787-AP	-2.35743	0.394915	0.182405	0.855007	0.0184019
ASMTL-88387-AP	2.35735	115.33	2.22632	5974.44	0.0184059
NDRG1-85242-ES	-2.3571	1.76488e-05	1.96916e-09	0.15818	0.0184185
OTUD5-89043-AP	-2.35707	0.217217	0.0610246	0.773186	0.0184199
UBAP1-86148-ME	-2.35706	0.450584	0.23221	0.874321	0.0184201
STC1-83085-AP	-2.35701	0.188771	0.0471892	0.755142	0.0184227
ZNF589-64570-AT	-2.35582	0.60092	0.393368	0.917982	0.0184821
MRPS16-12136-AT	-2.35568	0.0867632	0.0113505	0.663219	0.0184888
ING5-58408-AT	-2.35548	0.42111	0.20505	0.86483	0.0184987
TNFSF10-67648-ES	-2.35517	0.404084	0.190098	0.858944	0.0185143
CERCAM-87747-RI	-2.35486	0.472366	0.253034	0.881818	0.0185299
FBXL22-31065-AT	-2.35481	0.474718	0.255343	0.882563	0.0185322
DGCR6-61029-AT	2.35475	2.79723	1.18822	6.58506	0.0185354
PLEKHM3-57206-AT	-2.35415	0.484106	0.264627	0.885616	0.0185652
LYRM2-77013-AD	2.35386	5.62405	1.3351	23.6911	0.0185796
DGKZ-15556-ES	-2.35361	0.0418218	0.00297427	0.588065	0.0185919
FOSB-50451-AT	2.35308	2.74033	1.18343	6.34548	0.0186185
AURKA-59857-ES	2.3522	2.70237	1.18031	6.18721	0.0186627
MARCH2-47233-ES	-2.35182	0.0999083	0.0146516	0.681266	0.018682
AIDA-9891-AP	2.35128	5.27955	1.31905	21.1317	0.0187089
SYVN1-16791-AP	-2.35084	0.0059387	8.27086e-05	0.426414	0.0187312
SCO2-62846-AP	-2.34984	0.547842	0.331645	0.904979	0.0187813
FNTA-83749-AP	-2.34914	0.0528236	0.00454194	0.614349	0.0188169
PAM-72896-ES	2.34902	4.31241	1.27387	14.5988	0.0188231
TMUB2-41811-AD	-2.3489	0.404372	0.189964	0.860775	0.0188289
MYO9B-48231-AD	-2.34864	0.442781	0.224352	0.873873	0.0188422
FAM120AOS-86914-ES	2.34787	4.68696	1.29075	17.0192	0.0188809
PSMD11-40209-RI	2.34781	11.5054	1.49711	88.4202	0.0188844
ACYP1-28473-AP	-2.34772	0.0193999	0.000721754	0.521448	0.0188889
YIPF3-76290-ES	2.34571	2.27416	1.14466	4.51818	0.0189909
SP140L-57884-AP	-2.34571	0.519968	0.301064	0.898035	0.0189911
MAP3K8-11120-AP	2.34546	1.78663	1.10008	2.90165	0.0190036
AURKA-59867-ES	-2.34398	0.309047	0.115771	0.824994	0.0190793
TP73-327-ES	-2.34359	0.0090218	0.000175909	0.462699	0.0190992
VPS54-53763-ES	-2.34339	0.0433258	0.00313726	0.598333	0.0191093
ZC3H13-25815-AA	-2.34328	0.300344	0.109822	0.821387	0.0191148
RAB34-39963-AA	2.34316	2.13674	1.13221	4.03251	0.019121
NDRG1-85246-ES	-2.34277	0.286027	0.100378	0.815037	0.0191411
GJB2-25420-AP	-2.34226	0.103989	0.0156465	0.691122	0.0191673
TMEM230-58640-AD	-2.34184	0.171901	0.0393784	0.750414	0.0191892
RAB3IP-23348-ES	-2.34183	0.0105325	0.000233086	0.475936	0.0191895
HENMT1-3943-AP	-2.34159	0.339107	0.137158	0.838407	0.0192016
IFITM2-13642-AP	2.34152	8.15689	1.40778	47.2623	0.0192055
GMPR2-26926-AD	-2.3415	0.0225148	0.000940581	0.538942	0.0192063
TMCC1-66748-AP	2.34122	3.41282	1.22128	9.53702	0.0192208
SPTBN1-53579-AT	2.34115	18.1832	1.60361	206.178	0.0192245
CSNK1G3-73147-AA	-2.3409	0.372268	0.16276	0.851461	0.0192372
EIF2AK2-53218-AA	-2.34065	0.430913	0.212933	0.87204	0.0192501
ZDHHC4-78754-ES	2.33907	1.6988	1.08968	2.6484	0.0193319
WDR44-89937-ES	-2.33825	0.000198832	1.56965e-07	0.251866	0.0193745
TYK2-47509-AT	-2.33765	0.00182868	9.26026e-06	0.361122	0.0194055
SAMD9L-80449-RI	-2.33723	0.43473	0.21619	0.874185	0.0194274
CTDSPL2-30341-ES	-2.33697	0.000855476	2.28729e-06	0.319959	0.0194407
GUCD1-61407-AP	2.33664	1.89534	1.10857	3.24049	0.0194577
IPO11-72188-AP	2.33658	5.60155	1.32012	23.7685	0.019461
ANXA4-53859-AD	-2.33657	0.00272935	1.92916e-05	0.386144	0.0194617
IL32-33395-AA	-2.33638	0.291262	0.103485	0.819768	0.0194715
SIN3A-31877-AP	-2.33612	0.119315	0.0200473	0.71012	0.0194851
MYO9A-31494-ES	-2.33608	0.18037	0.0428635	0.758996	0.019487
DMKN-49146-RI	2.33568	2.37077	1.14896	4.89187	0.0195077
GNAI2-64970-AP	2.3348	4.07455	1.25298	13.25	0.0195541
DDX11-99807-ES	2.33466	1.86765	1.10545	3.15536	0.0195612
SLC35A4-73686-AP	-2.33443	0.0646656	0.00648824	0.644496	0.0195732
OXR1-84858-AD	2.33267	4.00033	1.24796	12.823	0.0196655
RNF10-24772-ES	-2.33251	0.0429238	0.00304635	0.604806	0.0196739
EVL-29239-AP	2.33246	1.51944	1.06909	2.15949	0.0196765
FEZ2-53195-AP	-2.33224	0.485204	0.264231	0.890977	0.0196879
HOPX-69378-AD	-2.33151	0.21089	0.0569942	0.780339	0.0197266
MRPS16-12135-AT	2.33087	10.9076	1.46262	81.3438	0.01976
ZNF195-13978-ES	2.32902	2.41777	1.15015	5.08248	0.019858
ENTPD1-12653-AP	2.32893	2.69758	1.17025	6.21827	0.0198626
STK25-58385-AP	2.3286	2.72093	1.17171	6.31852	0.0198804
PAM-72892-ES	2.32836	11.9867	1.4814	96.99	0.0198931
RNF38-86347-AP	2.3281	2.04015	1.11935	3.71843	0.019907
TP53AIP1-19437-AT	-2.32779	0.459742	0.238977	0.884447	0.0199231
CNTROB-39081-ES	-2.32763	0.008071	0.000139466	0.467075	0.019932
PLA2G15-37202-ES	-2.32603	0.000557085	1.00916e-06	0.307527	0.0200171
FEZ2-53193-AP	2.32571	2.04804	1.11934	3.74727	0.0200343
THAP8-49333-ES	-2.32478	0.209683	0.056181	0.782595	0.0200839
NKIRAS2-40976-AP	2.32444	54.5069	1.87187	1587.18	0.0201021
YY1AP1-8098-AP	2.32412	2.68451	1.16734	6.17354	0.0201192
NPR3-71662-AP	-2.32373	0.327283	0.12758	0.839583	0.0201399
ACTR10-27682-ES	-2.32356	0.319129	0.121773	0.836334	0.0201492
TRAF3IP3-9679-AP	-2.32338	0.48493	0.263343	0.892967	0.0201589
FLVCR2-28505-AP	2.32295	5.90719	1.31989	26.4378	0.0201819
FAM111B-16018-ES	-2.3229	0.133299	0.0243442	0.729895	0.0201845
VWA9-31199-AA	-2.32276	0.00939887	0.00018312	0.482408	0.0201923
GTPBP3-48295-AA	-2.32268	0.592596	0.381069	0.921539	0.0201965
ZNF333-48018-AT	-2.32239	0.217046	0.0597914	0.787886	0.0202118
LAMA3-44844-AP	-2.32182	0.530697	0.310867	0.905978	0.0202428
UMPS-66538-ES	2.32137	6.53672	1.3395	31.8991	0.0202666
HAUS7-90435-AT	-2.3213	0.0117285	0.000274808	0.500564	0.0202709
ZNF680-79827-AT	2.32107	9.84024	1.42721	67.8458	0.0202832
TSNARE1-85346-ES	-2.32044	0.247172	0.0759092	0.804831	0.0203173
EXOSC9-70504-AD	2.31993	11.3577	1.45795	88.4785	0.0203444
MPV17-52961-AP	2.31988	26.8517	1.66608	432.76	0.0203474
C11orf30-17891-AT	-2.31976	0.149533	0.0300242	0.744737	0.0203541
ARHGEF3-65366-AT	-2.31873	0.0914444	0.0121073	0.690661	0.0204097
NPR3-71661-AP	2.31867	3.06503	1.18919	7.89978	0.0204129
HMOX2-33746-ES	-2.31851	0.0650455	0.00645598	0.655347	0.0204218
DNM1-87722-AT	2.31819	7.77093	1.37279	43.9888	0.020439
SLC9B2-70175-ES	2.31748	3.64393	1.22077	10.877	0.0204778
UPF3A-26410-ES	-2.31684	0.309767	0.11494	0.834836	0.0205125
GSTT1-61366-ES	-2.31673	0.044932	0.00325545	0.620155	0.0205185
CD109-76764-AD	-2.31652	0.000386421	5.00534e-07	0.298323	0.02053
OXR1-84842-AP	-2.31641	0.502013	0.28021	0.899386	0.0205358
PRR5-62617-ES	-2.31638	0.0189439	0.000660663	0.543201	0.0205377
AFMID-94698-ES	2.31565	2.58152	1.15682	5.76083	0.0205772
STK3-84651-AP	2.31557	2.30784	1.13704	4.68419	0.020582
PDLIM5-69971-AT	2.31553	38.1923	1.74955	833.731	0.0205837
HEXB-72500-AP	2.31548	4.20409	1.24669	14.177	0.0205867
GRSF1-69451-AP	2.31546	9.52749	1.41353	64.2173	0.0205876
TK2-36723-RI	-2.31475	0.201997	0.052139	0.782579	0.0206264
LRTOMT-17537-ES	2.31439	4.42053	1.25559	15.5633	0.0206465
LRRK1-32747-AT	-2.31434	0.00076287	1.7469e-06	0.333144	0.020649
STK3-84652-AP	-2.31402	0.431269	0.211534	0.879256	0.0206669
NMRAL1-33735-RI	2.31321	2.04093	1.1151	3.73544	0.020711
MXD1-53864-ES	-2.31251	0.00761402	0.00012195	0.475385	0.0207494
ARHGAP9-22584-AP	2.31232	3.03799	1.18451	7.79177	0.0207602
CD59-14911-RI	-2.31194	0.107049	0.016103	0.71164	0.0207809
EPN2-39698-ES	-2.31085	0.000661354	1.32942e-06	0.329007	0.0208411
DPM3-7946-AP	-2.30956	0.088267	0.0112505	0.69251	0.0209125
TCEA1-83859-ES	-2.3092	0.00292338	2.06549e-05	0.413759	0.0209324
MGST3-8798-AP	-2.30852	0.000326163	3.57516e-07	0.297559	0.0209701
SIGLEC9-51306-AT	-2.30822	0.17035	0.0379015	0.765643	0.0209867
AEBP2-20664-AP	-2.30749	0.435131	0.214618	0.882214	0.0210277
USP14-44435-ES	-2.30742	0.0134745	0.000347284	0.522803	0.0210314
NEK3-25987-AP	2.30733	2.43646	1.14347	5.19148	0.0210366
OTUD5-89042-AP	2.30723	4.37356	1.24869	15.3185	0.0210421
MGAT4A-54656-AA	-2.30641	0.0507927	0.00403647	0.639146	0.021088
PIDD-13767-AD	-2.30555	0.0375101	0.00230155	0.61133	0.0211359
COL4A6-89859-AT	-2.30405	0.646126	0.445617	0.936856	0.0212199
S1PR3-86790-AP	2.30322	1.55263	1.06777	2.25767	0.0212663
CAPS-46956-AD	2.30299	9.57566	1.40005	65.4928	0.0212794
AKAP8L-48077-RI	-2.30289	0.000808513	1.88734e-06	0.346356	0.0212852
S1PR3-86791-AP	-2.30271	0.644586	0.443556	0.936726	0.0212954
MTFR1L-1196-AP	-2.30261	0.295105	0.10443	0.833929	0.021301
INPP5K-38317-ES	-2.30144	0.0117322	0.000266202	0.517064	0.0213668
FRK-77307-AP	-2.30109	0.0154956	0.00044536	0.539144	0.0213864
VLDLR-85739-ES	2.29991	1.78939	1.08981	2.93803	0.0214531
ECE1-961-AP	-2.29917	0.385948	0.171419	0.868957	0.0214951
TEX264-65102-ES	2.29846	2.15849	1.11998	4.15997	0.0215358
SIGLEC9-51305-AT	2.29775	5.60599	1.28842	24.3919	0.0215757
PPARGC1B-74051-RI	2.29544	1.59577	1.07069	2.37835	0.0217077
CCDC159-47684-ES	-2.29537	0.00198432	9.77477e-06	0.402826	0.0217118
RBM6-64939-ES	-2.29531	0.510616	0.287632	0.906467	0.0217152
PKP4-55681-AA	-2.29523	0.386136	0.171334	0.870233	0.0217202
SEC13-63359-AA	2.29522	269.562	2.26483	32083.4	0.0217207
ZNF7-85657-AT	2.29517	6.0847	1.30177	28.4408	0.0217236
ABCB8-82310-ES	-2.29485	0.00919477	0.000167596	0.504451	0.0217416
FAM134C-41083-AP	2.29444	2.74199	1.1584	6.4904	0.0217655
CAMK1D-10772-AT	-2.29338	0.296732	0.10506	0.838092	0.0218263
HAUS7-90441-ES	2.29312	558.406	2.50661	124398	0.0218413
BDKRB2-29188-AA	-2.2921	0.421666	0.201503	0.88238	0.0218996
H2AFX-19108-RI	-2.29206	0.0479315	0.00356786	0.643922	0.021902
GALE-1077-ES	2.292	17.9018	1.51882	211.002	0.0219054
PCBP2-22052-ES	2.29171	2.77692	1.15934	6.65146	0.0219222
FGFR2-13300-AT	-2.29134	0.486313	0.262489	0.900994	0.0219439
DNAJB5-86221-AP	-2.29111	0.205499	0.0530816	0.795567	0.021957
RNF212-68450-AT	2.29096	1.74733	1.08397	2.81666	0.0219658
C14orf23-27050-AT	2.29062	2.57152	1.14607	5.76992	0.0219855
LRRC23-20007-ES	2.29039	2.38864	1.13385	5.03206	0.0219987
PHF8-89231-AP	-2.28973	0.354341	0.145793	0.861206	0.0220367
NOP2-19884-AP	-2.28905	0.218514	0.0594179	0.803601	0.0220765
YIF1B-49611-AD	-2.28904	0.216972	0.0586418	0.802789	0.0220772
ZNF706-84737-AT	2.28832	11.0601	1.4118	86.6455	0.0221186
LY6E-85377-AA	-2.28825	0.387386	0.17194	0.872795	0.0221228
CSAD-93138-ES	-2.28759	0.525874	0.303206	0.912063	0.0221614
UBE2I-33053-AP	2.28633	20.8469	1.54273	281.703	0.0222348
YTHDC1-69421-ES	2.28595	87.3558	1.89164	4034.09	0.022257
EXOC7-43571-ES	-2.2857	0.364743	0.153602	0.86612	0.0222717
ATP10A-29729-AT	-2.28564	0.0708759	0.00732464	0.685821	0.0222754
SLC35A5-66109-AP	2.28506	2.34118	1.12865	4.85634	0.0223091
UBXN2A-52794-AP	2.28469	2.343	1.12864	4.86394	0.0223308
MED6-28182-AT	-2.28404	0.0897568	0.0113418	0.710319	0.0223691
AFMID-43844-ES	2.28398	2.00408	1.10365	3.63915	0.0223724
MMP11-61322-AA	-2.28366	1.7651e-05	1.4699e-09	0.211959	0.0223914
ZWINT-91667-AA	-2.28359	0.00326869	2.40438e-05	0.444371	0.0223959
PTPN3-87165-AP	-2.28345	0.423608	0.202663	0.885428	0.0224037
DYRK1A-60579-AA	2.28325	4.04744	1.21891	13.4397	0.0224155
EBPL-25899-AT	2.283	10.6141	1.39688	80.6503	0.0224304
PTPRK-77503-ES	-2.28292	0.0457694	0.00324067	0.646422	0.022435
IST1-37516-AA	-2.28265	0.0024525	1.40681e-05	0.427545	0.0224509
FAR1-14455-AP	2.28197	2.25112	1.12131	4.5193	0.0224914
FOSB-50450-AT	-2.28186	0.391709	0.175125	0.876155	0.0224979
RBBP6-35642-AT	2.28139	6.08951	1.28986	28.749	0.0225251
CAPN12-49690-AT	-2.28115	0.461692	0.237664	0.896893	0.0225395
PLEKHG3-27901-AP	-2.28112	0.422811	0.201803	0.885861	0.0225412
STRN3-27098-ES	-2.28099	0.349062	0.141298	0.862318	0.0225489
UVRAG-17885-ES	2.28074	4.95725	1.25251	19.6201	0.0225641
FBXL19-36201-AP	2.28058	1.96188	1.09937	3.50104	0.0225732
RPL36-46861-RI	-2.28028	0.244324	0.072762	0.820401	0.0225911
NFX1-86101-AT	-2.2792	0.234591	0.0674251	0.816211	0.022655
UCHL5-9240-AT	-2.27915	0.181675	0.0419106	0.78753	0.0226581
NFKB2-12949-AD	-2.27888	0.281273	0.0944816	0.837355	0.0226745
IGFLR1-95140-ES	2.27871	1.96082	1.09877	3.49922	0.0226845
LIPA-12485-AP	2.27741	1.9419	1.09692	3.43778	0.0227615
MDK-15567-AP	-2.27714	0.102038	0.0143083	0.727668	0.0227779
PLEKHH3-41104-AD	-2.27623	0.19073	0.0457951	0.794366	0.0228325
HEXB-72499-AP	-2.27592	0.169917	0.0369265	0.781874	0.0228508
LETMD1-21749-ES	2.2759	2.97939	1.16364	7.62848	0.0228518
TMEM52-232-AP	-2.27527	0.474966	0.250111	0.90197	0.0228898
FUT8-28010-AP	2.27521	1.87173	1.09074	3.21192	0.0228931
EBPL-25912-ES	2.27488	2.49192	1.13473	5.47237	0.0229133
TCF3-46533-AP	-2.27453	0.479715	0.254733	0.903401	0.0229344
DNM1-118812-ES	2.27448	2.01295	1.10158	3.67834	0.022937
TNPO2-47846-AP	2.27446	2.22994	1.11727	4.45067	0.0229382
HEATR1-10394-AT	2.27388	518.465	2.37015	113413	0.0229731
MED4-25852-AD	2.27351	5.10992	1.25227	20.8511	0.0229956
TP53AIP1-19438-AT	2.27307	2.13359	1.11003	4.10098	0.0230222
FBLIM1-772-AT	2.2728	6.36422	1.29012	31.3949	0.023038
COL1A1-409549-ES	-2.27271	0.160505	0.0331369	0.77744	0.0230435
KCTD10-24290-AP	-2.27254	0.302117	0.107609	0.848206	0.0230541
AIDA-9892-AP	-2.27192	0.209044	0.0541767	0.806605	0.0230911
HMCES-66713-AP	-2.27169	0.254097	0.0779199	0.828614	0.0231051
TBC1D9B-74987-AP	2.27164	2.63898	1.14241	6.09607	0.0231084
SIRPB2-58514-AT	-2.27158	0.288479	0.098694	0.843216	0.023112
PIP5K1C-46724-ES	-2.27145	0.335348	0.130635	0.860856	0.0231197
WAC-11099-AP	-2.27145	0.271018	0.0878517	0.836079	0.0231199
ZBTB44-19492-RI	2.27123	12.3399	1.41112	107.909	0.0231329
OCIAD1-69232-ES	-2.27101	0.000605828	1.01252e-06	0.36249	0.0231462
C1QTNF6-62093-RI	2.27089	7.19645	1.31025	39.5259	0.0231537
TMEM107-39135-ES	2.2707	1.7938	1.08325	2.97045	0.0231652
MFF-57797-ES	2.27032	13.8351	1.43211	133.657	0.023188
SDCBP-83934-AA	-2.2702	0.090576	0.0113909	0.720227	0.0231954
LAMA3-44845-AP	2.27015	1.85376	1.08799	3.15852	0.0231988
KIAA0226-68303-AP	2.27014	1.72707	1.07752	2.7682	0.0231989
CAPN12-49691-AT	2.27005	2.16448	1.11124	4.21598	0.0232045
COL4A6-89858-AT	2.26993	1.52469	1.05929	2.19456	0.0232116
FAM189B-8048-AA	-2.26927	0.103729	0.0146535	0.734284	0.0232517
NLRC5-36517-ES	-2.26915	0.0436447	0.00291863	0.652656	0.0232594
NARG2-30962-AT	2.26908	4.53758	1.22879	16.7559	0.0232633
CTPS2-88575-AP	-2.26858	0.438301	0.214921	0.893854	0.0232937
ERCC1-50445-ES	-2.26837	0.151952	0.0298311	0.774009	0.0233068
PSMC3IP-41081-RI	-2.26826	0.352247	0.142984	0.867778	0.0233133
TSPAN4-13789-AP	2.26822	4.41423	1.22359	15.9248	0.0233158
MLH3-28469-ES	2.26761	2.15997	1.11013	4.20264	0.0233532
TSPO-62571-AP	2.26751	122.042	1.91866	7762.86	0.023359
SLC22A17-26733-AP	2.26709	3.63346	1.19099	11.0849	0.0233847
SLC35A5-66110-AP	-2.26636	0.428087	0.205531	0.891631	0.0234291
STAT6-22523-ES	2.26616	97.4117	1.85651	5111.24	0.0234414
IL18BP-17471-AT	2.26592	2.83562	1.15111	6.9852	0.0234565
UBE2D3-70148-AD	2.26574	2.76229	1.14697	6.65252	0.0234672
TTC8-28787-ES	-2.2653	0.466757	0.241426	0.902395	0.0234941
CDIPT-35971-AA	-2.26457	7.2681e-05	1.90337e-08	0.277536	0.0235389
LRRC8C-3725-AT	-2.26398	3.71375e-05	5.42653e-09	0.254157	0.0235755
CASP1-18519-RI	-2.26381	0.400295	0.181187	0.884367	0.0235861
MTFR1L-1210-AA	-2.2631	0.396478	0.177933	0.88345	0.0236292
SH3BP2-68592-AP	2.26282	2.11062	1.10515	4.03089	0.0236466
FBLIM1-769-AP	2.26221	1.52926	1.0584	2.2096	0.0236843
HAUS2-30188-ES	-2.26208	0.000370624	3.94562e-07	0.348138	0.0236922
PLEKHG3-27902-AP	2.26198	2.37961	1.12272	5.04361	0.0236987
THSD1-25997-ES	-2.26147	0.119482	0.0189506	0.753326	0.0237301
SEPT1-36101-ES	-2.26036	0.033064	0.00171983	0.635661	0.0237988
TNFRSF13B-39450-AT	2.26026	1.63108	1.06716	2.49299	0.0238049
FCGRT-50957-AP	-2.26006	0.458475	0.233133	0.90163	0.0238174
NDUFAF6-84593-AT	-2.26002	0.0578925	0.00489244	0.685044	0.0238202
BCAS4-59782-ES	2.25987	4.0098	1.20238	13.3723	0.0238293
ARL4C-58078-RI	2.25933	68.7402	1.75159	2697.67	0.0238631
DGCR6-61028-AT	-2.25928	0.385379	0.168515	0.881329	0.0238662
PLEKHG5-466-AP	2.25878	2.78955	1.14535	6.79404	0.0238973
FCGRT-50958-AP	2.25875	2.18727	1.10908	4.31362	0.0238991
RANBP1-61137-AP	2.25836	2.80865	1.1462	6.88231	0.0239232
IL1RL1-54791-AT	2.25805	1.88668	1.08742	3.27342	0.0239423
GSK3A-50137-AP	-2.25783	0.362671	0.150361	0.87476	0.0239565
PACS2-29637-AD	2.25759	14.8183	1.42676	153.903	0.0239713
MUTYH-2593-AP	2.2568	2.86385	1.14842	7.14165	0.0240208
TRIP10-47083-ES	-2.25659	0.399794	0.180306	0.886464	0.0240335
PHYKPL-74856-AA	-2.25652	0.023144	0.000878676	0.609605	0.0240378
BCL11A-53667-ES	-2.25639	0.178977	0.0401566	0.797697	0.0240461
ING5-58407-AT	2.25613	2.24926	1.11228	4.54849	0.0240627
RNASE1-26468-ES	2.25601	3.08344	1.15924	8.20155	0.0240698
FUT8-28012-AP	-2.25592	0.538733	0.314766	0.92206	0.0240759
LIPA-12486-AP	-2.25548	0.520875	0.295515	0.918092	0.0241034
ARID5A-54532-ES	-2.25523	0.291294	0.0997231	0.850879	0.024119
HDHD1-88437-AD	-2.25493	3.72559e-05	5.269e-09	0.263429	0.0241374
C21orf58-60929-AA	-2.25482	0.49839	0.272074	0.912962	0.0241448
ECM2-86876-AT	2.25467	6.97455	1.289	37.738	0.0241543
MPPE1-44653-AA	-2.25462	0.370275	0.156113	0.878233	0.024157
PLEC-85518-AD	-2.25441	0.186682	0.0433913	0.803158	0.0241707
ARHGEF1-50099-AP	-2.25396	0.503678	0.277432	0.914429	0.0241986
UBXN2A-52795-AP	-2.25389	0.434314	0.210301	0.896947	0.0242032
C1S-20068-AP	-2.25378	0.300195	0.105423	0.854812	0.0242099
SLTM-30918-ES	-2.25342	0.047516	0.00335733	0.672491	0.0242324
OXR1-84844-AP	2.25339	1.96343	1.09183	3.53083	0.0242349
PFKFB4-64705-AT	-2.25329	0.00169385	6.58402e-06	0.435771	0.0242406
UHRF1BP1-75791-AT	2.25271	16.5088	1.4396	189.316	0.0242778
TSC22D3-89836-AP	-2.25223	0.243908	0.0714446	0.832688	0.0243078
TMEM150A-54307-AD	-2.25213	0.228459	0.0632118	0.825693	0.0243139
SMIM19-83741-AD	2.2519	3.7104	1.18528	11.6151	0.0243285
AKAP8L-48078-AD	-2.25143	0.000127037	5.15514e-08	0.313053	0.0243582
HDAC10-62799-ES	-2.25137	0.000593321	9.20937e-07	0.382251	0.024362
EP400NL-25240-AP	-2.25104	0.518386	0.292552	0.918549	0.0243828
DERA-20592-AP	-2.25087	0.000352658	3.47478e-07	0.357915	0.024394
NDOR1-88283-AD	2.25081	16.608	1.43776	191.844	0.0243978
BAIAP2-44102-ES	2.25078	4.1471	1.20176	14.3111	0.0243997
RBBP6-35643-AT	-2.25072	0.171944	0.037115	0.796573	0.0244034
GMEB1-1390-AA	-2.24998	0.379047	0.162814	0.882458	0.02445
DTNB-52860-AP	2.24994	523.09	2.24066	122117	0.0244527
MCRS1-21591-ES	2.24979	6.24679	1.26619	30.8187	0.0244625
SCO2-62848-AP	2.24961	4.04275	1.19705	13.6534	0.0244738
TENC1-21926-AD	-2.24927	0.00159375	5.81661e-06	0.436688	0.0244955
SMPD1-14098-AA	-2.24872	0.0844582	0.00979748	0.728063	0.02453
TMEM150A-54305-ES	2.24841	2.88528	1.14561	7.26674	0.0245499
RUFY3-69444-AP	2.24831	1.78017	1.07677	2.94309	0.0245563
FLT3LG-50945-AT	-2.24767	0.238494	0.0683345	0.83237	0.0245974
AK2-1654-ES	-2.2476	0.276643	0.0902109	0.84836	0.0246018
HDHD3-87276-AP	-2.24721	0.359727	0.14747	0.877491	0.0246264
NPIPA8-34239-ES	2.24716	2.76447	1.13878	6.71094	0.0246299
DPP9-46826-ES	-2.24699	0.4566	0.230443	0.90471	0.0246404
FAM134C-41082-AP	-2.24686	0.381656	0.164725	0.88427	0.024649
NR3C1-73880-AP	2.24681	2.20017	1.10591	4.37716	0.0246522
YLPM1-28426-AT	2.24663	48.6385	1.64155	1441.14	0.0246639
ORC4-55531-ES	-2.24654	0.00156398	5.5766e-06	0.438624	0.0246697
VPS28-85598-AP	-2.24622	0.0118605	0.000247541	0.56828	0.0246896
PHF8-89232-AP	2.24561	2.85828	1.14292	7.14812	0.0247292
PAIP1-71959-AP	2.24455	3.93773	1.18979	13.0323	0.0247972
TNFSF12-38966-AT	-2.24451	0.274269	0.0886299	0.84874	0.0247994
PTPN3-87164-AP	2.24437	2.12899	1.10049	4.11873	0.0248088
TMEM45A-65827-ES	-2.24402	0.660938	0.460347	0.948933	0.0248312
NPIPB4-35514-AD	2.24314	2.93383	1.14554	7.51383	0.0248879
MS4A6A-16057-RI	-2.24302	0.192554	0.0456448	0.812296	0.0248955
TBX6-36064-AT	-2.24245	0.506754	0.279757	0.917937	0.0249325
SNAPIN-7752-ES	2.24243	114.25	1.81641	7186.2	0.0249338
PRPF6-60185-ES	-2.24184	0.000106888	3.60712e-08	0.316736	0.0249716
HSPBP1-52050-AP	2.24111	3.61264	1.17484	11.1089	0.0250187
TPBG-76840-AP	-2.24093	0.20308	0.050366	0.818835	0.0250307
DYNC2LI1-53399-AA	-2.24019	0.378343	0.16165	0.885518	0.0250784
TXNL4A-46276-ES	2.23989	13.4272	1.38347	130.316	0.0250978
IP6K2-64748-AD	2.23936	2.28787	1.10878	4.72081	0.0251327
ZNF335-59652-ES	-2.23909	0.00898457	0.000145248	0.555756	0.0251502
ATF2-56081-ES	-2.23855	0.0927117	0.011556	0.743808	0.0251852
DAG1-64874-AP	-2.23821	0.406804	0.185068	0.894211	0.0252073
RAD51AP1-19777-AT	-2.2379	1.96157e-12	1.09443e-22	0.0351576	0.0252279
IRF1-73278-ES	-2.23783	0.396234	0.176126	0.891411	0.0252319
OAZ2-31130-ES	-2.23637	0.00015378	6.99964e-08	0.33785	0.0253278
CRYZ-3468-ES	-2.23586	0.0295724	0.0013504	0.647606	0.0253607
FAR1-14454-AP	-2.23521	0.397612	0.17711	0.892642	0.0254036
TFPT-51788-AP	-2.2346	0.00833916	0.00012524	0.555268	0.0254436
LGMN-29011-ES	-2.23428	0.461012	0.233729	0.909309	0.0254646
GMFG-49779-ES	-2.23424	0.0036412	2.64164e-05	0.501899	0.0254672
BRIP1-42893-AT	-2.23423	0.040918	0.00247869	0.67547	0.0254682
NT5E-76918-ES	-2.23392	0.224885	0.0607285	0.832778	0.0254887
MTX2-56124-ES	-2.23353	0.208832	0.0528328	0.825446	0.0255143
FIGNL1-79688-RI	-2.23295	0.563072	0.340112	0.932192	0.025552
TUBGCP2-13527-AP	-2.23281	0.379887	0.162433	0.888452	0.0255613
GSN-87438-ES	-2.23233	0.0631861	0.00559216	0.713943	0.025593
DMTF1-80304-ES	2.23231	84.0265	1.71704	4111.99	0.0255947
NCKIPSD-64733-AA	2.23185	2.75198	1.13125	6.69472	0.0256251
ATP2A2-24418-RI	-2.23184	0.000538369	7.25064e-07	0.399746	0.0256253
APOO-88704-ES	-2.23166	0.000451583	5.20896e-07	0.391493	0.0256373
RAMP2-41121-AP	-2.23132	0.209609	0.0531308	0.826942	0.0256599
COX20-10475-ES	2.23095	3.78736	1.17557	12.2018	0.0256846
BCL2L14-20497-AT	-2.23066	0.00524885	5.20956e-05	0.528844	0.0257039
AACS-25170-AP	-2.23002	0.241703	0.0693826	0.842006	0.0257461
UQCRQ-73318-RI	2.22995	9.61477	1.31525	70.2863	0.0257508
AURKA-59868-ES	-2.22976	0.531938	0.305416	0.926467	0.0257634
SPG11-30344-AT	-2.22935	0.000568781	7.98006e-07	0.4054	0.0257908
BBS1-17062-ES	2.22923	5.76614	1.23568	26.9069	0.0257984
ARHGEF1-50098-AP	2.22918	1.94627	1.08374	3.49527	0.025802
ZNF532-45682-AP	-2.22896	0.537654	0.311551	0.927846	0.0258163
STAU2-84158-ES	-2.22867	0.451737	0.224585	0.908637	0.025836
USP48-994-AP	-2.2281	0.509259	0.281284	0.922002	0.0258738
TUBB3-38167-AP	2.22798	1.58569	1.05703	2.37877	0.0258819
BPGM-81853-ES	-2.22798	0.228094	0.0621503	0.837114	0.025882
ARHGAP5-27130-ES	-2.22782	0.198463	0.0478408	0.823303	0.0258928
PKP4-55684-ES	-2.22736	0.299378	0.103591	0.865206	0.0259231
DDX52-40542-ES	-2.22694	0.34591	0.135893	0.880498	0.0259511
TTLL12-62574-AP	2.22674	2.95794	1.13874	7.68336	0.0259649
GUSB-79863-ES	2.22661	15.4143	1.38758	171.233	0.0259734
ZNF384-19923-ES	-2.22627	0.299246	0.103451	0.865611	0.0259962
SAYSD1-76037-AP	-2.22626	0.395447	0.174732	0.894963	0.0259966
TBX6-36063-AT	2.22624	1.95578	1.08354	3.53017	0.0259983
BRIP1-42892-AT	2.22577	27.0203	1.48243	492.503	0.0260299
FHIT-65491-AT	-2.22547	0.0796962	0.0085889	0.7395	0.0260498
AIF1L-87920-AD	-2.22534	0.00323806	2.07717e-05	0.504775	0.0260585
AFMID-94694-ES	-2.2247	0.42829	0.202908	0.904018	0.0261011
RARRES2-82227-RI	-2.22468	0.336236	0.128711	0.878364	0.0261024
KIAA0895L-36958-AD	2.22451	2.58143	1.11939	5.95305	0.0261141
MAX-27935-RI	-2.22437	0.495417	0.266809	0.919902	0.0261235
SLC52A2-85579-AD	2.22416	6.31406	1.2447	32.0297	0.0261377
CLN6-31360-ES	-2.22411	0.382206	0.163759	0.892054	0.0261407
GARNL3-87624-ES	-2.22392	0.16191	0.0325387	0.805654	0.0261538
SLC39A1-7765-AP	-2.22378	0.0489643	0.00342914	0.699157	0.0261632
C1S-20067-AP	2.22363	3.23732	1.14947	9.1175	0.026173
PHYKPL-100587-ES	-2.22331	0.0916216	0.0111415	0.753444	0.0261949
ZNF185-90409-ES	2.22314	2.58518	1.119	5.9724	0.0262061
CD63-22242-AP	2.22297	57.8671	1.61629	2071.78	0.0262177
ZSWIM7-39405-ES	-2.22282	0.509305	0.280936	0.923314	0.0262282
REV1-54714-ES	-2.22277	0.277826	0.0898071	0.859478	0.0262311
SFXN4-13257-ES	-2.22274	0.388971	0.169167	0.894374	0.0262332
GSK3A-50138-AP	2.22274	2.59425	1.1193	6.0128	0.0262333
CCDC141-56398-AT	-2.22273	0.454974	0.227199	0.911103	0.0262337
JAG1-58691-AP	2.22258	147.155	1.80359	12006.3	0.0262443
PEX5-20092-AD	-2.22131	0.370658	0.154404	0.88979	0.0263297
CAMK1D-10773-AT	2.22126	3.17727	1.14567	8.81147	0.0263332
TRAPPC2L-38043-AA	-2.221	0.0681589	0.00637005	0.729294	0.026351
CBLL1-81372-ES	2.22078	3.70485	1.16627	11.7691	0.0263658
NAE1-36875-ES	2.22048	85.84	1.68605	4370.26	0.0263859
UNC93B1-17268-AA	-2.22029	0.0504796	0.0036165	0.7046	0.0263992
SUPT7L-53039-ES	-2.22027	1.43514e-05	7.6138e-10	0.270511	0.0264003
LTBP3-16861-AP	-2.22021	0.197304	0.0470861	0.826755	0.0264043
MTA2-16357-AP	2.2201	5.32873	1.21658	23.3404	0.0264123
MRPS18C-69793-ES	-2.22005	0.0335368	0.00167411	0.67183	0.0264153
NME6-64633-AD	2.21984	2.37043	1.10632	5.07892	0.0264295
PSMD13-13633-ES	-2.21978	0.00130826	3.72272e-06	0.459754	0.026434
FEZ2-53197-ES	-2.21961	0.170526	0.0357637	0.813087	0.0264455
ATP6V0A2-25113-AP	-2.21956	0.446969	0.219512	0.910115	0.0264483
FGD6-23744-AT	-2.21953	0.0571893	0.00457041	0.715606	0.0264509
ANKMY1-58260-RI	-2.219	0.00130588	3.70244e-06	0.460597	0.0264866
NEK6-87528-AP	-2.21878	0.244775	0.0706048	0.848596	0.0265016
AP4M1-80885-AP	-2.21874	0.372224	0.155477	0.891133	0.0265045
NR1H3-15699-RI	2.2186	4.52973	1.19256	17.2054	0.0265142
B4GALT3-8588-AA	-2.21854	0.295406	0.100592	0.867513	0.026518
PAPLN-28281-ES	-2.21846	0.304065	0.106213	0.870472	0.0265234
PPP3CB-12153-AT	2.2181	2.95359	1.13432	7.69066	0.0265482
RABGGTA-26949-RI	-2.21808	0.145084	0.0263513	0.7988	0.0265493
RPE-57242-ES	-2.21716	0.211398	0.0535168	0.835048	0.0266125
AURKA-59856-ES	2.21687	1.84282	1.07341	3.16372	0.0266319
NR2C2AP-48614-ES	2.21558	21.9054	1.42779	336.075	0.02672
AACS-25173-AP	2.21539	2.54584	1.11376	5.81931	0.0267331
PPP1R7-58335-ES	2.21532	84.1235	1.66681	4245.7	0.0267378
PTPN6-20023-AP	-2.21517	0.461707	0.233024	0.914814	0.0267486
PLAC8-69770-AP	2.21463	1.77409	1.06815	2.9466	0.0267855
AGTRAP-670-AA	-2.21423	0.420249	0.195095	0.905246	0.0268131
AMZ2-43128-AP	2.21361	1.85877	1.07362	3.21811	0.0268559
TNFSF12-38967-AT	2.21335	3.59182	1.15764	11.1444	0.0268736
SSSCA1-16869-AT	-2.21257	0.0430837	0.00265795	0.698359	0.026927
AFMID-43807-ES	-2.21231	0.0723525	0.0070632	0.741149	0.0269454
SCNN1B-35581-ES	-2.21216	0.159278	0.0312803	0.81104	0.0269556
WIPF1-56034-AT	-2.21194	0.115787	0.0171391	0.782229	0.0269705
UBE2K-69075-ES	-2.21184	0.000328973	2.69736e-07	0.401219	0.0269774
ZNF277-81443-ES	-2.21184	0.114611	0.0168107	0.781389	0.0269775
CREB1-57173-AP	-2.21163	0.0333177	0.00163477	0.679036	0.0269924
ANAPC11-44201-AP	-2.21151	0.00373246	2.63124e-05	0.529457	0.0270007
SLC39A14-83007-AT	2.21144	497.673	2.02622	122237	0.0270053
TMEM120A-80146-ES	2.21129	3.57955	1.15597	11.0844	0.0270158
INO80E-36016-ES	-2.21103	0.434344	0.207392	0.909653	0.027034
ZGPAT-60160-AP	-2.21091	0.00182546	6.81689e-06	0.488831	0.0270422
NF2-61660-ES	-2.21088	0.410161	0.186138	0.903802	0.0270439
TBP-78496-AA	-2.21031	0.31781	0.115006	0.878242	0.0270837
ANKRD65-169-AD	-2.21001	0.109199	0.01532	0.778362	0.0271044
FAM13B-73499-ES	2.20979	3.02828	1.13345	8.09076	0.0271194
IMPA1-84299-ES	2.20912	14.773	1.35487	161.08	0.0271665
ITGB3-42068-AT	-2.20899	0.66592	0.464248	0.955199	0.0271754
PHACTR4-1384-AP	2.20861	2.00026	1.08118	3.70065	0.0272018
MFF-57810-ES	-2.20789	0.140128	0.0244844	0.801978	0.0272519
PPP3CB-12154-AT	-2.20774	0.346114	0.134943	0.887742	0.0272625
TP53-39036-AT	2.20757	83.7425	1.64317	4267.86	0.0272743
ORC4-55528-ES	-2.20746	0.0615975	0.00518603	0.731628	0.0272822
GTPBP2-76312-AP	2.20745	54.3392	1.56506	1886.67	0.0272827
AKAP17A-88391-AT	2.20739	14.351	1.34795	152.788	0.027287
SEC31A-69718-AP	2.20726	2.16833	1.09058	4.31116	0.0272961
RAMP2-41120-AP	2.20698	4.49304	1.18314	17.0626	0.0273156
ZNF771-36106-AT	-2.20606	0.431788	0.204753	0.910569	0.0273798
CALU-81712-ES	-2.20595	0.480562	0.250603	0.921535	0.0273876
VWA9-31210-ES	2.20548	1.7838	1.06655	2.98339	0.0274205
MAN2A2-32514-AD	2.20532	16.7351	1.36816	204.7	0.0274314
TSPAN14-12366-AP	2.20532	2.26798	1.09538	4.69584	0.0274319
SLC19A1-60882-AT	-2.20508	0.00474357	4.07881e-05	0.551668	0.0274486
NOL8-86848-AA	2.20395	3.07477	1.13241	8.34876	0.0275279
AMPD3-14345-AP	2.20388	1.8066	1.06765	3.05702	0.0275327
CLCN2-67937-ES	-2.20386	0.10186	0.0133594	0.776637	0.0275342
IL1RL1-54793-AT	-2.20352	0.542397	0.314775	0.934617	0.0275581
FAM131A-67926-AP	-2.20352	0.0958494	0.0119054	0.771675	0.0275581
CELF1-15759-AP	2.20308	4.47472	1.17981	16.9714	0.0275892
CDYL-75231-AP	2.20305	2.96201	1.12729	7.7828	0.027591
ZP3-80169-AP	2.20294	2.25398	1.09378	4.64484	0.0275993
PER1-39100-AA	-2.20277	0.0906955	0.0107171	0.76753	0.0276106
IL4I1-51118-AP	-2.2026	0.514201	0.284503	0.92935	0.0276232
ATP6V1G2-DDX39B-75749-AA	-2.20258	0.482072	0.251843	0.922773	0.0276245
C19orf54-49966-RI	-2.20253	0.244541	0.0698337	0.856327	0.0276281
ZNF512-53022-ES	-2.20221	0.108004	0.0149006	0.782844	0.0276502
BCL11A-53658-AT	-2.20207	0.403312	0.179738	0.904988	0.0276607
ZNF384-19927-AD	2.20179	1.85247	1.07006	3.20698	0.02768
TP53I3-52810-ES	2.20174	36.6524	1.4851	904.586	0.0276838
ARHGEF7-26286-ES	2.20162	17.688	1.37072	228.248	0.0276921
FLT4-75017-AA	-2.20159	0.00305654	1.76384e-05	0.529666	0.0276943
FBXW7-70855-RI	2.20154	1.9597	1.07662	3.56711	0.0276982
SAYSD1-76036-AP	2.20138	2.48357	1.10491	5.58248	0.0277088
RABEP2-35888-AP	-2.20075	0.477546	0.247257	0.922319	0.027754
TCF25-38159-ES	2.20062	3.80279	1.15728	12.4959	0.0277632
C22orf39-61056-AT	2.19994	26.8976	1.43204	505.211	0.0278114
CDYL-75229-AP	-2.19959	0.337786	0.128421	0.888483	0.0278358
RAB15-27920-AP	2.19943	3.52339	1.14697	10.8235	0.0278471
AKNAD1-3954-AT	2.19916	2.2603	1.09275	4.67531	0.0278668
COPS7B-57937-AP	-2.19886	0.347212	0.135238	0.891432	0.0278881
DENND1B-9307-ES	-2.19849	0.484716	0.254155	0.924436	0.0279141
PCYT2-44229-ES	2.19784	558.485	1.98294	157295	0.0279608
TMCO1-8805-AP	-2.19765	0.164346	0.0328352	0.822587	0.0279743
GSDMD-85420-AP	-2.19754	0.454945	0.22537	0.918379	0.0279819
MRPL52-26640-ES	2.19745	2.74536	1.11532	6.75767	0.0279883
SCO2-62849-AD	2.19701	3.97749	1.16063	13.6309	0.0280199
LRRC28-32660-ES	-2.19675	0.162817	0.032238	0.822298	0.0280382
STK25-58387-ES	-2.19605	0.000158406	6.42813e-08	0.390355	0.0280885
CACYBP-9040-AP	2.19557	110.227	1.65637	7335.35	0.0281228
ZNF329-52415-ES	-2.19555	0.593382	0.372384	0.945536	0.0281239
SEC31A-69720-AP	-2.19492	0.466064	0.235713	0.921528	0.0281692
MFSD11-43681-AA	-2.19456	0.00390267	2.75554e-05	0.552734	0.028195
AURKB-39140-ES	2.19442	5.05843	1.1891	21.5186	0.0282054
SENP5-68262-ES	-2.19429	0.273838	0.0861107	0.870827	0.0282149
RAD17-72351-AP	2.19307	2.24687	1.08986	4.63219	0.0283026
CEP135-69337-AT	2.19265	11.4124	1.29482	100.587	0.0283325
COPS7B-57936-AP	2.19251	2.81378	1.11597	7.09458	0.0283427
VRK2-53646-ES	-2.19193	0.0760185	0.00759049	0.761322	0.0283842
KLC4-76229-RI	2.19177	3.18487	1.13034	8.97377	0.0283958
NPM2-82919-ES	-2.19177	0.0575099	0.00447362	0.73931	0.028396
PAM-72901-ES	2.19061	5.57222	1.19825	25.9125	0.0284803
MOSPD1-90172-ES	-2.18987	0.367707	0.150182	0.900294	0.028534
TJAP1-76278-ES	2.18985	4.11605	1.16013	14.6034	0.028535
MDK-15566-AP	2.18947	9.28735	1.26316	68.2849	0.0285625
SLC35A2-89036-AA	2.18896	5.81504	1.20222	28.127	0.0285999
COPS5-84072-RI	-2.18788	0.0173639	0.000459912	0.65557	0.0286782
PHF12-40027-RI	-2.18731	0.248948	0.0716121	0.865429	0.0287196
SDC1-52759-AP	2.18718	2.52987	1.10122	5.81194	0.0287295
FBXL12-47430-ES	2.18717	7.43213	1.23166	44.8472	0.0287303
SAT1-88698-AT	-2.18687	0.136956	0.0230541	0.813605	0.0287521
INTS4-17992-AT	-2.18674	0.0550591	0.00409486	0.740319	0.0287617
CDH1-37245-ES	-2.18658	2.0554e-05	1.29288e-09	0.326763	0.0287733
FBXL12-47422-ES	2.18647	2.50133	1.09963	5.68975	0.0287813
IST1-37509-AP	2.18637	3.14218	1.12587	8.76946	0.0287886
GCDH-47886-RI	-2.18611	0.117273	0.0171667	0.801144	0.0288074
MTHFD2-54028-ES	-2.18608	0.110926	0.0154468	0.796572	0.02881
INO80E-36017-ES	-2.1859	0.16131	0.0314208	0.828138	0.0288228
ING2-71272-AP	2.18526	2.98694	1.11943	7.97	0.0288697
VWA5A-19212-AT	-2.18473	0.466076	0.234975	0.924467	0.028909
GSS-59054-ES	-2.18452	0.026066	0.00098847	0.68736	0.0289244
KIF2C-2575-ES	2.18394	44.878	1.47715	1363.46	0.0289668
DAG1-64873-AP	2.18281	2.36076	1.09166	5.10527	0.0290494
PCBP4-65136-ES	-2.1828	0.533227	0.303182	0.937823	0.0290502
PARL-96578-ES	-2.18259	0.16618	0.0331632	0.832721	0.0290663
HNRNPF-11325-AP	2.18246	2.58075	1.10148	6.04665	0.0290759
MPV17-52963-AP	-2.182	0.0330231	0.00154296	0.706772	0.0291097
RPL9-69058-AP	-2.18099	0.00382767	2.57527e-05	0.568915	0.029184
LSM7-46607-AA	-2.18082	0.0121121	0.00022938	0.639568	0.029197
DNAJC25-87230-ES	-2.17994	0.514511	0.283083	0.935141	0.0292618
PDCD1LG2-85791-ES	-2.1799	0.163992	0.0322746	0.833263	0.0292651
TRIP12-57850-ES	-2.17934	0.0053102	4.77768e-05	0.590208	0.0293064
RABEP2-35889-AP	2.17907	2.05393	1.07505	3.92412	0.0293266
TNK2-68209-ES	-2.17875	0.190994	0.0430763	0.846841	0.0293503
ABR-38286-AP	-2.17859	0.320381	0.115065	0.892055	0.0293618
FASTKD3-71527-RI	-2.17846	0.0192327	0.000549776	0.672812	0.029372
METTL5-55893-RI	2.17827	3.00581	1.11661	8.09137	0.029386
RAP1B-22946-ES	-2.17782	0.143911	0.0251425	0.823725	0.0294197
COL6A2-60898-AA	2.1778	5.91019	1.19448	29.2431	0.029421
SUPT4H1-42659-AP	2.17764	2.28184	1.08596	4.79463	0.0294325
NAAA-69564-AT	2.17737	2.8552	1.11044	7.34138	0.0294532
FASTKD2-57158-AD	-2.17701	0.185711	0.0407919	0.845479	0.0294795
TMPRSS13-18949-AT	-2.17695	0.523636	0.292459	0.937551	0.0294845
DFNB31-87322-AP	-2.17575	0.396403	0.172238	0.912315	0.0295743
CUL1-82147-AP	2.1757	2.1904	1.08085	4.43895	0.029578
APOA1BP-8287-AT	-2.17512	0.002362	1.01481e-05	0.549758	0.029621
MYO16-26244-AP	-2.17484	0.00405874	2.83844e-05	0.580368	0.0296418
HNRNPA1-22144-RI	-2.17451	0.148013	0.026452	0.828207	0.029667
CD96-66048-AT	2.17408	3.51939	1.13193	10.9424	0.029699
BTN3A1-75663-AA	-2.17385	0.00825747	0.000109309	0.62379	0.0297165
HOXB3-42192-AP	2.17383	2.48116	1.09352	5.62967	0.0297181
MYO5B-45496-ES	2.17373	2.77719	1.10567	6.97565	0.0297253
NPIPB5-35571-AD	2.17373	2.91179	1.11082	7.63263	0.0297256
GLB1L-57659-ES	2.17357	2.79209	1.10617	7.04751	0.0297375
RAB6A-17708-ES	-2.17341	1.98573e-05	1.14186e-09	0.345325	0.0297498
DIP2A-60944-ES	-2.17329	0.173123	0.0356018	0.841854	0.0297582
DMPK-50522-ES	2.17328	3.88458	1.14248	13.2081	0.0297589
RBM6-64945-ES	-2.1729	0.208552	0.0507161	0.857599	0.0297875
CD96-66049-AT	-2.17246	0.366763	0.148382	0.906547	0.0298207
TMEM205-47666-RI	-2.17227	0.129565	0.0204982	0.81895	0.029835
TMCO6-73700-RI	-2.17224	0.339965	0.128427	0.899935	0.0298378
HOXA10-79056-AP	2.17204	1.50531	1.04074	2.17724	0.0298528
ZNF550-52293-AD	-2.17148	0.070624	0.00645693	0.772465	0.0298946
ARMC6-48568-ES	-2.1707	0.159274	0.0303212	0.836649	0.0299541
STAU2-84157-AT	2.17066	1.91884	1.0653	3.45624	0.0299569
NDUFA3-51780-RI	-2.17042	0.176445	0.0368359	0.845173	0.0299748
SMAGP-21828-AP	-2.17034	0.362117	0.144697	0.90623	0.0299812
LSMD1-39059-AP	-2.17013	0.410309	0.183523	0.917343	0.029997
BRD8-73507-ES	2.17011	3.68231	1.13454	11.9515	0.0299987
CUL1-82148-AP	-2.16927	0.466303	0.234048	0.929034	0.0300625
PTPN6-20022-AP	2.1691	2.0626	1.0723	3.96747	0.0300747
ADAMTSL2-88070-AP	-2.16803	0.267842	0.0814074	0.881239	0.0301564
[truncated: 772 more rows]
